# 1 Comparative genomics reveals the origin of fungal 2 hyphae and multicellularity

3  
4 Enikő Kiss<sup>1,2</sup>, Botond Hegedüs<sup>1</sup>, Torda Varga<sup>1</sup>, Zsolt Merényi<sup>1</sup>, Tamás Kószó<sup>1</sup>, Balázs  
5 Bálint<sup>1</sup>, Arun N. Prasanna<sup>1&</sup>, Krisztina Krizsán<sup>1</sup>, Meritxell Riquelme<sup>3</sup>, Norio Takeshita<sup>4</sup>,  
6 László G. Nagy<sup>1\*</sup>

7  
8  
9 <sup>1</sup>Synthetic and Systems Biology Unit, Institute of Biochemistry, BRC-HAS, 6726 Szeged,  
10 Hungary

11 <sup>2</sup>University of Szeged, Faculty of Science and Informatics, 6720, Szeged, Hungary

12 <sup>3</sup>Department of Microbiology, Centro de Investigación Científica y de Educación Superior de  
13 Ensenada, 22860 Ensenada, Baja California, Mexico

14 <sup>4</sup>Microbiology Research Center for Sustainability (MiCS), Faculty of Life and Environmental  
15 Sciences, University of Tsukuba, 305-8572, Japan

16  
17 \*Author for correspondence: [lnagy@fun genomelab.com](mailto:lnagy@fun genomelab.com)

18 <sup>&</sup>Current address: Red Sea Science and Engineering Research Center, 4700 King Abdullah  
19 University of Science and Technology (KAUST), Thuwal 23955-6900, Kingdom of Saudi Arabia

## 22 Abstract

23 Hyphae represent a hallmark structure of multicellular fungi with immense importance in their  
24 life cycle, including foraging for nutrients, reproduction, or virulence. Hypha morphogenesis has  
25 been the subject to intense interest, yet, the origins and genetic underpinning of the evolution of  
26 hyphae are hardly known. Using comparative genomics, we here show that the emergence of  
27 hyphae correlates with multiple types of genetic changes, including alterations of gene structure,  
28 gene family diversification as well as co-option and exaptation of ancient eukaryotic genes (e.g.  
29 phagocytosis-related genes). Half of the gene families involved in hypha morphogenesis have  
30 homologs in unicellular fungi and non-fungal eukaryotes and show little or no duplications  
31 coincident with the origin of multicellular hyphae. Considerable gene family diversification was  
32 observed only in transcriptional regulators and genes related to cell wall synthesis and  
33 modification. Despite losing 35-46% of their genes, yeasts retained significantly more  
34 multicellularity-related genes than expected by chance. We identified 414 gene families that  
35 evolved in a correlated fashion with hyphal multicellularity and may have contributed to its  
36 evolution. Contrary to most multicellular lineages, the origin of hyphae did not correlate with the  
37 expansion of gene families encoding kinases, receptors or adhesive proteins. Our analyses  
38 suggest that fungi took a unique route to multicellularity that involved limited gene family  
39 diversification and extensive co-option of ancient eukaryotic genes.

## 40 Introduction

41 The evolution of multicellularity (MC) is considered one of the major transitions in the history of  
42 life<sup>1</sup>. It evolved in several pro- and eukaryote lineages<sup>2-7</sup>, each representing a unique solution to  
43 the challenges of multicellular organization<sup>6</sup>. Among the eukaryotes, two major modes for  
44 acquiring multicellularity are the clonal and aggregative routes<sup>5,6,8-10</sup>, which differ in how multi-  
45 celled precursors emerged by adhesion, cooperation, communication and functional  
46 diversification of cells<sup>3,11,12</sup>.

47  
48 Fungi represent one of the three kingdoms where multicellular forms dominate among  
49 extant species<sup>13</sup>, yet, our knowledge on the evolutionary origin of multicellularity in this group is  
50 very incomplete. While most multicellular lineages can be recognized as either clonal or  
51 aggregative by comparisons to their unicellular relatives, fungal multicellularity has been  
52 recalcitrant to such categorization<sup>6,14</sup>. The thalli of fungi are made up of hyphae, thin, tubular  
53 structures that grow by apical extension to form a mycelium that explores and invades the  
54 substrate. Hyphal multicellularity has a number of unique properties compared to clonal and  
55 aggregative multicellularity, raising the possibility that its evolution follows markedly different  
56 principles<sup>7</sup>. First, hyphae might have evolved by the gradual elongation of substrate-anchoring  
57 rhizoids of early fungi<sup>15-18</sup>, through multinucleate intermediates, in contrast to clonal and  
58 aggregative lineages, where the first multi-celled clusters probably emerged via related cells  
59 sticking together (e.g. choanoflagellates<sup>19</sup>), or gathering to form a syncytial body (e.g.  
60 *Capsaspora*)<sup>9</sup>. Because early hyphae were uncompartimentarized, their evolution could have  
61 bypassed the need to resolve group conflicts and align the fitness of individual cells<sup>7</sup>.  
62 Alternatively, it is possible that conflicts are resolved at the level of individual nuclei<sup>20</sup>. Second,  
63 hyphae maximize foraging and nutrient assimilation efficiency and minimize competition for  
64 nutrients by a fractal-like growth mode<sup>16,21,22</sup>. This mode of origin differs from that of other  
65 multicellular lineages where selection for increased size possibly helped avoiding predation<sup>2</sup>.  
66 Hyphae might have also facilitated the transition of fungi to terrestrial life<sup>23</sup> and confer immense  
67 medical relevance to pathogenic fungi<sup>24</sup>. Hyphae of extant fungi rarely stick to each other in  
68 vegetative mycelia and adhesion becomes key only in fruiting bodies<sup>25-27</sup> - which, in terms of  
69 complexity level, resemble complex multicellular metazoans and plants<sup>7,28</sup> - or in the attachment  
70 to host surfaces<sup>29</sup>. Thus, whereas in most multicellular lineages adhesion, cell-cell cooperation,  
71 communication and differentiation represent the main hurdles to the emergence of multicellular  
72 precursors<sup>3,6,30-32</sup>, fungi might have had different obstacles to overcome.

73  
74 While the origins of hyphae are poorly known, information on the molecular and cellular  
75 basis of hyphal morphogenesis is abundant (for recent reviews see refs<sup>33-38</sup>), permitting  
76 evolutionary genomic analyses of the origins of hyphae. Hyphal morphogenesis builds on cell  
77 polarization networks<sup>39</sup>, the exo- and endocytotic machinery<sup>40</sup>, long range vesicle transport as  
78 well as fungal-specific traits such as cell wall synthesis and assembly<sup>41</sup>, and the selection of  
79 branching points and sites of septation<sup>42</sup>, among others. A key structure of hyphal growth is the  
80 Spitzenkörper<sup>43</sup>, which acts as a distribution center for vesicles transporting cell wall materials  
81 and various factors to the hyphal tip. The cytoplasmic microtubule network provides the  
82 connection between vesicle cargo through the ER and Golgi and the Spitzenkörper, from where

83 vesicles move along actin microfilaments to the hyphal tip and secrete their content to deposit  
84 new cell wall components and provide surface expansion. Further key processes include the  
85 recycling of excess membrane in the subapical zone, the activation of cAMP pathways and  
86 mitogen activated protein kinase (MAPK) cascades and finally the transcriptional control of  
87 morphogenesis (for detailed reviews see refs<sup>44-49</sup>).

88

89 A complex hyphal thallus has been reported from a 407 million year old fossil  
90 Blastocladiomycota<sup>51</sup>, whereas Glomeromycotina-like hyphae and spores were preserved 460  
91 million years ago<sup>50,52</sup> indicating that hyphal growth dates back to at least the Ordovician. Most  
92 Dikarya and Mucoromycota grow true hyphae, whereas a significant diversity of forms is found  
93 in the early diverging Blastocladiomycota, Chytridiomycota and to a smaller extent the  
94 Zoopagomycota. The Chytridiomycota is dominated by unicellular forms that anchor themselves  
95 to the substrate by branched, root-like rhizoids<sup>16,50</sup> which have been hypothesized as the  
96 precursors to hyphae<sup>15,53</sup>. An alternative hypothesis designates hypha-like connections in the  
97 thalli of polycentric chytrid fungi (e.g. *Physocladia*) as intermediates to true hyphae<sup>17</sup>. Like  
98 chytrids, most Blastocladiomycota form mono- or polycentric, unicellular thalli, although some  
99 species form wide, apically growing structures resembling true hyphae (e.g. *Allomyces*) or  
100 narrow exit tubes on zoosporangia (e.g. *Catenaria* spp.)<sup>16,50,54</sup>. In spite of these intermediate  
101 forms, the unicellular dominance in these phyla aligns well with a unicellular ancestry and  
102 potential convergent origins of hypha-like structures<sup>17</sup>.

103

104 Here we examine the evolution of hyphal multicellularity in fungi by reconstructing  
105 historical patterns of known hyphal morphogenesis genes as well as by systematic searches of  
106 fungal genomes for gene families whose evolution correlates with that of hyphae. We analyze  
107 the genomes of 4 plesiomorphically unicellular, 40 hyphal (one of which is ambiguous) and 14  
108 secondarily simplified (yeast-like) fungi as well as 13 non-fungal relatives. Given the likely  
109 convergent origins of hyphae, we focus our analyses on multiple nodes of the fungal tree to  
110 where origin(s) of hyphal growth can be localized with confidence. Our analyses reveal a deep  
111 eukaryotic origin of most morphogenesis-related families, limited gene family diversification in  
112 correlation with the emergence of hyphal MC and that secondarily simplified yeast-like fungi  
113 retained most of the genes for multicellular growth.

## 114 Results and discussion

### 115 Hyphae evolved in early fungal ancestors

116 To understand the origin of hyphae, we constructed a species phylogeny representing 71  
117 species (Supplementary Table 1) by maximum likelihood analysis of a supermatrix of 595  
118 single-copy orthologs (175,535 characters Fig. 1a).

119

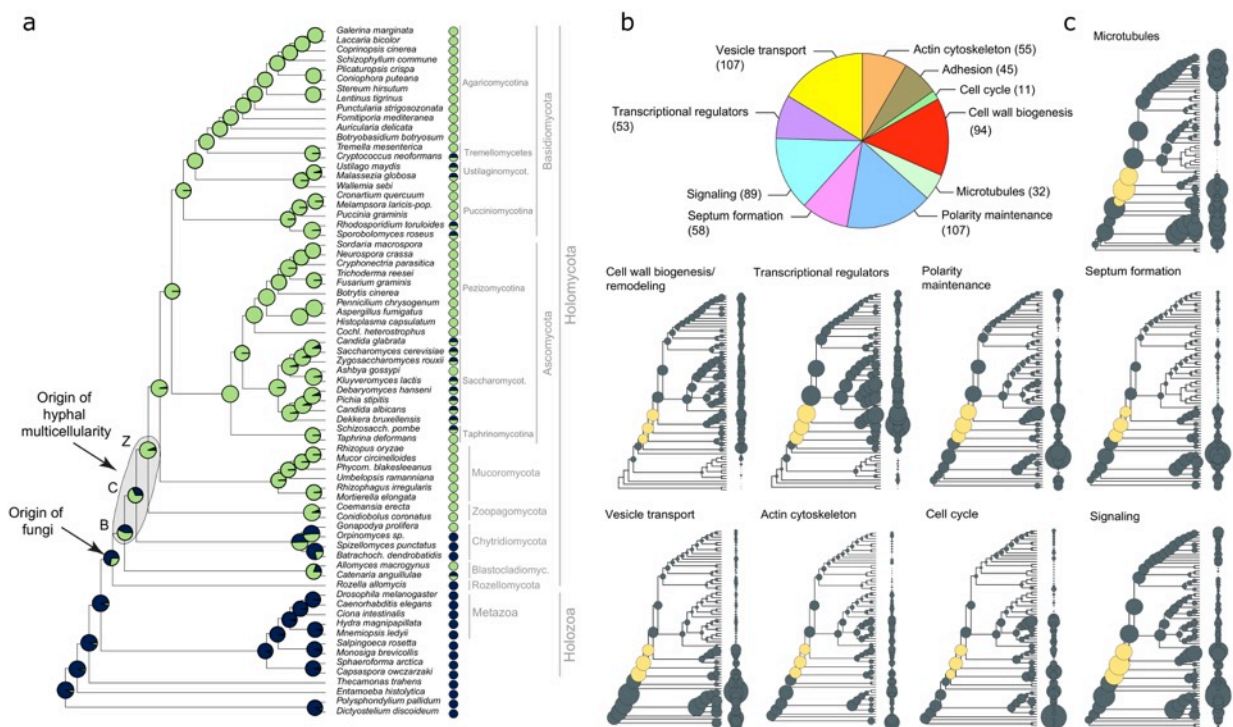

120  
 121 Fig. 1. The evolution of hyphal multicellularity and underlying genes in fungi. (a) Phylogenetic  
 122 relationships among 71 species analyzed in this study. Pie charts at nodes show the proportional  
 123 likelihoods of hyphal (green) and non-hyphal (dark blue) ancestral states reconstructed using Bayesian  
 124 MCMC. Character state coding of extant species used in ancestral state reconstructions is shown next to  
 125 species names. BCZ nodes: origin of hyphal growth could be assigned with confidence are highlighted  
 126 (note the uncertainty imposed by filamentous Blastocladiomycota). (b) the distribution of literature-  
 127 collected hypha morphogenesis genes among 10 main functional categories. (c) Ancestral  
 128 reconstructions of gene copy number in 9 main hypha morphogenesis-related categories of genes (see  
 129 Fig. 5c for adhesion). Bubble size is proportional to reconstructed ancestral gene copy number. BCZ  
 130 nodes are shown in yellow.

131  
 132 Our species phylogeny recapitulates recent genome-based phylogenies of fungi<sup>55–58</sup>, with the  
 133 Rozellomycota, Blastocladiomycota and the Chytridiomycota splitting first, second and third off  
 134 of the backbone, respectively (ML bootstrap: 100%). We performed ancestral character state  
 135 reconstruction using Bayesian MCMC to identify the putative origin of hyphal growth. This  
 136 supported an emergence of hyphae from unicellular ancestors in basal fungi. The distribution of  
 137 posterior probability values indicated three nodes as the most likely origins of hyphal  
 138 multicellularity, which represent the split of Blastocladiomycota, Chytridiomycota and  
 139 Zoopagomycota lineages, referred hereafter to as BCZ nodes. The posterior probability for the  
 140 hyphal state started to rise in the most recent common ancestor (MRCA) of the  
 141 Blastocladiomycota and higher fungi (PP: 0.53, Fig. 1a) and increased to 0.68 and 0.92 in the  
 142 next two nodes along the backbone of the tree. This suggests that hyphae evolved either in one  
 143 of the BCZ nodes or it may have been a gradual process unfolding in these three nodes. This  
 144 uncertainty likely reflects diverse hypha-like morphologies in the Blastocladio- and  
 145 Chytridiomycota and is consistent with the convergent origins of hypha-like morphologies<sup>7,17,18</sup>.

146 To account for this uncertainty, we focus on BCZ nodes in subsequent analyses of hypha  
147 morphogenesis genes.

148

## 149 The evolution of hypha morphogenesis genes

150 Our survey of the literature for hyphal multicellularity-related genes yielded 651 genes (from 519  
151 publications), mostly from well-studied model systems such as *A. fumigatus*, *A. nidulans*, *N.*  
152 *crassa*, *S. cerevisiae* and *C. albicans* (Supplementary Table 2). We categorized genes  
153 according to the broader function they fulfill in hyphal growth into nine functional groups: actin  
154 cytoskeleton regulation, polarity maintenance, cell wall biogenesis/remodelling, septation  
155 (including septal plugging), signaling, transcriptional regulation, vesicle transport, microtubule-  
156 based transport and cell cycle regulation. The categories “polarity maintenance” and “vesicle  
157 transport” contained the largest number of genes (107 in each), whereas “cell cycle regulation”  
158 contained the fewest (11) (Fig.1b). The collected genes grouped into 362 families by Markov  
159 clustering of the a 71-genome dataset.

160

161 Reconstructions of gene duplication/loss histories for nine functional categories of hypha  
162 morphogenesis gene families are shown on Fig. 1c. A general pattern that emerges from these  
163 is that the origin of many gene families (181 families, 50%) predate that of hyphal MC (Fig. 2,  
164 Supplementary Fig. 1), indicating that fungi have co-opted several conserved eukaryotic  
165 functionalities for hyphal growth. A significant proportion of multicellularity-related gene families  
166 (164 families, 45.3%) emerged after the origin of hyphal MC, indicating lineage- and species-  
167 specific genetic innovations. Only 17 families (4.7%) originated in BCZ nodes and were  
168 conserved thereafter (Table 1), providing potential candidates that shaped the evolution of  
169 hyphal MC. These include two families of transcriptional regulators (encoding StuA and MedA  
170 proteins in *A. fumigatus*)<sup>59,60</sup>, six related to cell wall biogenesis, three to actin cytoskeleton  
171 regulation, three to polarity maintenance, two families involved in signaling and one involved in  
172 cell cycle regulation. One of the families contains the *S. cerevisiae* Pan1, an endocytic adaptor  
173 protein at the plasma membrane. Pan1 triggers the recruitment of the Arp2/3 complex to the site  
174 of endocytosis, which is necessary for the recycling of excess membrane in the subapical region  
175 during hyphal growth<sup>40</sup>. Another example is the polarisome component BNI-1 from *N. crassa*.  
176 Knockout studies showed that it mediates actin cable assembly in filamentous fungi and has a  
177 role in diverse morphogenesis-related processes<sup>61</sup>. Other proteins involved in establishing cell  
178 polarity are the Bem1 actin cytoskeleton reorganizing factor<sup>62,63</sup> and the Rax1, associated with  
179 bipolar budding in *S. cerevisiae*<sup>64</sup>.



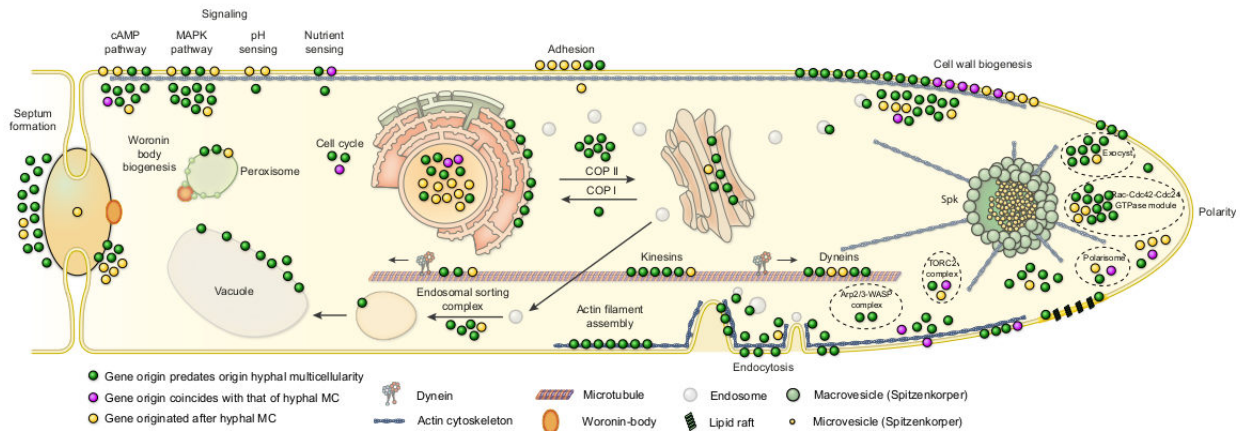

180  
181 Fig. 2. Phylogenetic age distribution of hypha morphogenesis genes. Schematic outline of terminal hyphal  
182 cell is shown with genes marked by dots and colored by phylogenetic age. Genes whose origin predates  
183 that of hyphal multicellularity (green, 72,2%) dominate the hyphal morphogenetic machinery, followed by  
184 genes that originated after hyphal MC (yellow, 21,2%) and genes whose origin approximately coincides  
185 with that of hyphae (purple, 6,6%). Data based on only *A. fumigatus* orthologs. See also Supplementary  
186 Figure 1 for gene names.  
187

| Emergence of gene family                                                               | <i>A. fumigatus</i> ortholog | <i>S. cerevisiae</i> ortholog | functional category        | cluster ID |
|----------------------------------------------------------------------------------------|------------------------------|-------------------------------|----------------------------|------------|
|                                                                                        | Afu7g03870                   | PAN1/YIR006C                  | actin cytoskeleton         | 4903       |
|                                                                                        | crh3/Afu3g09250              | UTR2/YEL040W                  | cell wall biogenesis       | 374        |
| Ica of Dikarya, Mucoromycota,<br>Zoopagomycota, Chytridiomycota,<br>Blastocladiomycota | gel7/Afu6g12410              | GAS1/YMR307W                  | cell wall biogenesis       | 435        |
|                                                                                        | Afu6g04940                   | BNR1/YIL159W                  | polarity establishment     | 3689       |
|                                                                                        | Afu4g04120                   | BEM1/YBR200W                  | polarity establishment     | 2482       |
|                                                                                        | stuA/Afu2g07900              | PHD1/YKL043W                  | transcriptional regulation | 2479       |
|                                                                                        | medA/Afu2g13260              | NA                            | transcriptional regulation | 8521       |
|                                                                                        | Afu6g07910                   | SLM1/YIL105C                  | actin cytoskeleton         | 1561       |
|                                                                                        | Afu8g04520                   | SLA1/YBL007C                  | actin cytoskeleton         | 5953       |
|                                                                                        | Afu4g06130                   | WHI2/YOR043W                  | cell cycle regulation      | 2915       |
| Ica of Dikarya, Mucoromycota,<br>Zoopagomycota, Chytridiomycota                        | Afu4g00620                   | DFG5/YMR238W                  | cell wall biogenesis       | 843        |
|                                                                                        | Afu8g02320                   | NA                            | cell wall biogenesis       | 3398       |
|                                                                                        | chsD/Afu1g12600              | NA                            | cell wall biogenesis       | 9065       |
|                                                                                        | rgsB/Afu4g12640              | RAX1/YOR301W                  | polarity establishment     | 2900       |
|                                                                                        | Afu2g08800                   | SSY1/YDR160W                  | signaling                  | 49         |
|                                                                                        | ricA/Afu4g08820              | NA                            | signaling                  | 5950       |
| Ica of Dikarya, Mucoromycota,<br>Zoopagomycota                                         | kre6/Afu2g11870              | KRE6/YPR159W                  | cell wall biogenesis       | 293        |

188 Table 1: List of the 17 gene families whose emergence shows correlation with the evolution of hyphal MC  
189 based on COMPARE analysis.  
190

191 Gene families related to septation, polarity maintenance, cell cycle control, vesicle  
192 transport and microtubule-based transport are generally more diverse in animals, non-fungal  
193 eukaryotes and their ancestors than in fungi, suggesting that despite the key role of these

194 families in hyphal MC, they evolved primarily by gene loss in fungi (Fig 1c). Cell wall synthesis  
195 and remodeling as well as transcription regulation related families, on the other hand, show  
196 expansions in MC fungi, suggesting that the diversification of these gene families could have  
197 played roles in the evolution of hyphal MC (Fig 1c).

198  
199 Ninety-three (25.7%) of the 362 hyphal morphogenesis-related gene families showed  
200 duplications in BCZ nodes (Supplementary Table 3). Enrichment analysis of gene duplications  
201 revealed no individual gene families with significantly increased number of duplications  
202 (Benjamini-Hochberg corrected  $P < 0.05$ , Fisher's exact test) in BCZ nodes, relative to the rest of  
203 the tree (Supplementary Table 4). The same analysis on the 9 functional groups showed  
204 significantly increased numbers of duplications in the cell wall biogenesis and transcriptional  
205 regulation categories. These analyses suggest that the evolution of hyphal growth in BCZ nodes  
206 did not generally coincide with a period of extensive gene duplication except in cell wall  
207 biogenesis and transcriptional regulation-related gene families. Collectively, reconstructions of  
208 gene family evolution revealed the lack of a major burst of gene family origin or that of  
209 duplications coincident with the evolution of hyphal MC.

210  
211 We analyzed whether changes in basic structural properties of genes show a correlation  
212 with the evolution of hyphal MC. Significant differences ( $P < 0.05$ ) were observed in gene, CDS  
213 and intron lengths between unicellular and multicellular fungi (Supplementary Fig. 2,  
214 Supplementary Table 5). CDS lengths of septation and polarity maintenance genes were  
215 significantly higher in multicellular than in unicellular fungi ( $P=0.0012-0.00017$ , Supplementary  
216 Fig. 2). An opposite pattern was observed in intron lengths, which were on average longer in  
217 unicellular fungi in actin cytoskeleton, cell wall biogenesis, polarity maintenance, septation and  
218 vesicle transport related genes. In actin cytoskeleton-related genes the CDS length and intron  
219 length showed the same pattern: both of them were longer in multicellular species. Gene and  
220 CDS lengths were significantly longer in unicellular than in multicellular fungi in genes encoding  
221 adhesion and microtubule-based transport proteins. On the other hand, interestingly, no  
222 significant changes in gene structure were detected in cell wall biogenesis and transcriptional  
223 regulation-related genes, the two categories that displayed significant gene family diversification  
224 in early filamentous fungi.

## 225 Phagocytosis is lost, but phagocytotic genes are retained by fungi

226 Our sets of hypha morphogenesis genes included several entries associated with phagocytosis  
227 in non-fungal eukaryotes. This is surprising given that phagocytosis is not known in fungi and  
228 their rigid cell wall forms a physical barrier to it. We therefore examined the fate of phagocytosis  
229 genes in filamentous fungi based on the phagocytotic machinery of *D. discoideum*<sup>65,66</sup> and other  
230 eukaryotes<sup>67</sup>. Filamentous fungi have retained several phagocytotic gene families but lost others  
231 (Fig. 3). For example, members of the Arp2/3 complex, which nucleates actin filaments and  
232 triggers actin cytoskeleton rearrangements<sup>68</sup> is conserved in filamentous fungi and is involved in  
233 hyphal growth<sup>69</sup>. Engulfment and cell motility genes (ELMO1/2) are found in all filamentous  
234 fungi, but are convergently lost in budding and fission yeasts as well as in *C. neoformans*, *M.*  
235 *globosa* and *W. sebi*, all of which have reduced capacities for hyphal growth. The DOCK  
236 (dedicator of cytokinesis) protein family, which interacts with ELMO proteins, is represented as a

237 single gene copy in filamentous fungi and yeasts. This family contains orthologs of *S. cerevisiae*  
 238 DCK1 (a homolog of human DOCK1), which has been shown to influence hypha  
 239 morphogenesis<sup>70</sup>. Of the broader Wiskott-Aldrich syndrome family of proteins, which reorganize  
 240 the actin cytoskeleton during phagocytosis, the WASP family is conserved across fungi, the  
 241 WAVE family is only represented in early diverging fungi and non-fungal eukaryotes, whereas  
 242 the WASH family has been lost in fungi, with homologs detected only in non-fungal eukaryotes,  
 243 consistent with recent reports<sup>71,72</sup>. These patterns reveal the conservation of several  
 244 phagocytotic genes in fungi, despite the loss of phagocytosis and the evolution of rigid cell walls  
 245 and osmotrophy. Previous functional analyses have shown that several of the retained genes  
 246 are involved in hypha morphogenesis in fungi, indicating that members of the phagocytic  
 247 machinery were probably exapted for hyphal multicellularity in ancient fungi.

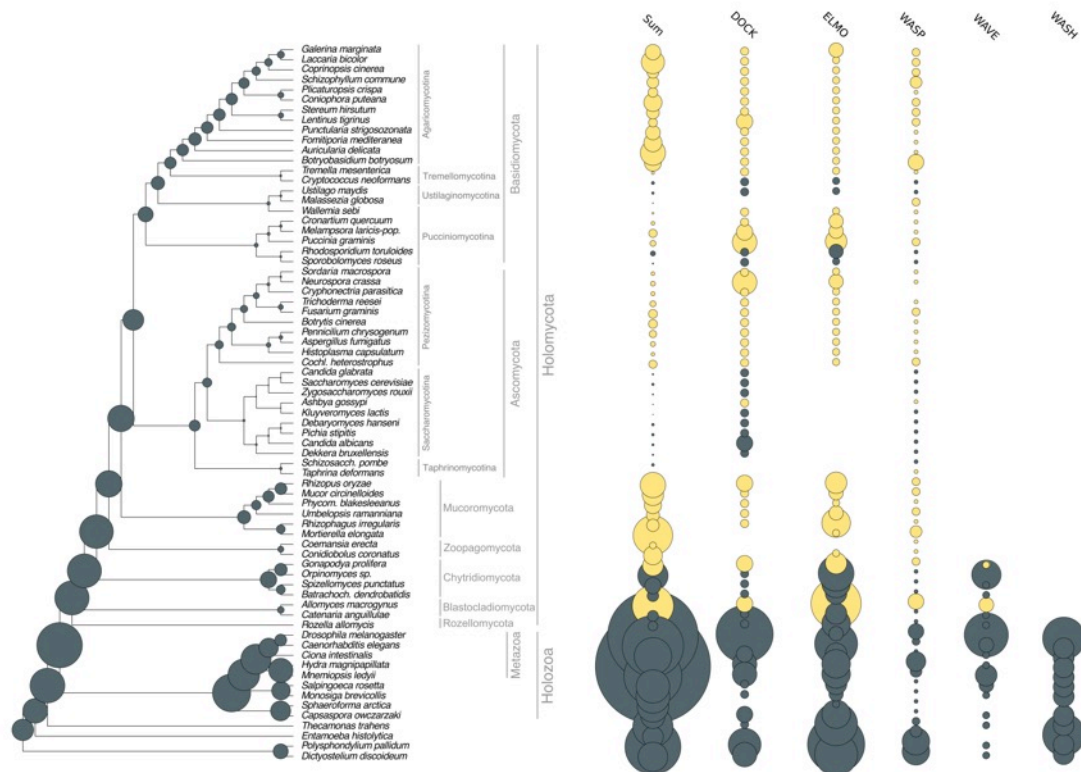

248  
 249 Fig. 3. Evolutionary dynamics of phagocytosis-related gene families. Several phagocytic gene families  
 250 retained in filamentous fungi (DOCK, ELMO, WASP). WAVE family retained only in early fungi  
 251 (Blastocladiomycota and Chytridiomycota), WASH family is represented only in non-fungal eukaryotes.  
 252 Bubble size is proportional to ancestral and extant gene copy number. Copy numbers of filamentous fungi  
 253 are labelled with yellow.  
 254

## 255 Genome-wide screen for correlated evolution between multicellularity and 256 gene family expansion

257 To identify further gene families with a potential connection to hyphal MC, we systematically  
 258 searched for families that show substantial dynamics in BCZ nodes. We reasoned that gene  
 259 families underlying hyphal MC should originate or diversify in BCZ nodes and be conserved in



260 descendent filamentous fungi. Searching for gene families fitting these criteria yielded 414  
261 families (ANOVA,  $p < 0.05$ , Supplementary Table 6), 114 of which originated in BCZ nodes, while  
262 the others showed duplication rates that exceeded the expectation derived from genome-wide  
263 collection of gene families (Fig. 4). These included several known morphogenetic families (e.g.  
264 Bgt3, RgsB and Gel2 of *A. fumigatus*, Bem1 and Rax1 of *S. cerevisiae*), genes involved in actin  
265 cytoskeleton and cell wall assembly, mating, pheromone response (GpaA of *A. fumigatus*),  
266 sporulation and transporters, among others (Supplementary Table 6). Several of the identified  
267 families contain genes with reported growth defects in *A. fumigatus* or *S. cerevisiae*, indicating  
268 that our searches recovered genes relevant for hyphal MC. For example, Rax proteins are  
269 major regulators of cellular morphogenesis and are involved in bud site selection in budding  
270 yeasts<sup>73,74</sup>, polarized growth in *S. pombe*<sup>75</sup> and polarity maintenance in filamentous fungi<sup>76</sup>. The  
271 finding that these families originated in BCZ nodes makes them candidates for being key  
272 contributors to the evolution of hyphal MC. We further detected a fungal-specific cluster of  
273 tropomyosins (TPM1 in *S. cerevisiae*), which maps to the MRCA of Blastocladiomycota and  
274 other fungi and comprises genes involved in polarized growth and the stabilization of actin  
275 microfilaments. The family containing *S. pombe* Dip1 homologs (Afu6g12370 in *A. fumigatus*)  
276 emerged in the node uniting Chytridiomycota with higher fungi and contains a single gene per  
277 species afterwards, except an expansion in WGD Mucoromycota<sup>77</sup> and losses in the  
278 Saccharomycotina. In *S. pombe*, Dip1 activates the Arp2/3 complex without preexisting actin  
279 cables<sup>78,79</sup> and thus initiates cortical actin patch assembly and endocytosis. Because it does not  
280 require pre-existing actin cables, it mediates actin cytoskeleton regulation through a mechanism  
281 that seems to be specific to multicellular fungi. Finally, we detected the family containing *S.*  
282 *cerevisiae* Dpp1 homologs, which shows a significant expansion (4 duplications) in BCZ nodes.  
283 This family regulates morphogenetic transitions in dimorphic fungi through the synthesis of the  
284 fungal signal molecule farnesol<sup>80</sup>, which prompts us to speculate that it might have contributed  
285 to the elaboration of farnesol-based communication in fungi.

286  
287 Because the emergence of hyphal multicellularity overlaps significantly with that of other  
288 fungal traits, it is challenging to unequivocally separate signals conferred by these traits from  
289 those of hyphal MC. It is conceivable that a portion of the 414 gene families (Supplementary  
290 Table 6) were detected because of signals conferred by phylogenetically co-distributed traits,  
291 not necessarily multicellularity itself (see Beaulieu 2016<sup>81</sup> for a conceptually analogous problem  
292 in analyzing taxonomic diversification). One such trait could be osmotrophy, the feeding  
293 mechanism of fungi to absorb soluble goods generated by extracellular enzyme complexes<sup>82</sup>.  
294 We detected 20 gene families that showed strong correlation with hyphal MC and were  
295 annotated as various transporters; such families could hypothetically be related to osmotrophy.  
296 Further, among the 414 detected families, there were 84 that are currently functionally  
297 uncharacterized and thus it is impossible to speculate about their role in hyphal MC.  
298 Collectively, these families indicate that there are plenty of fungal genes that evolved in concert  
299 with hyphal MC and that await functional characterization to establish links to hyphal MC or  
300 other fungal functions.

301

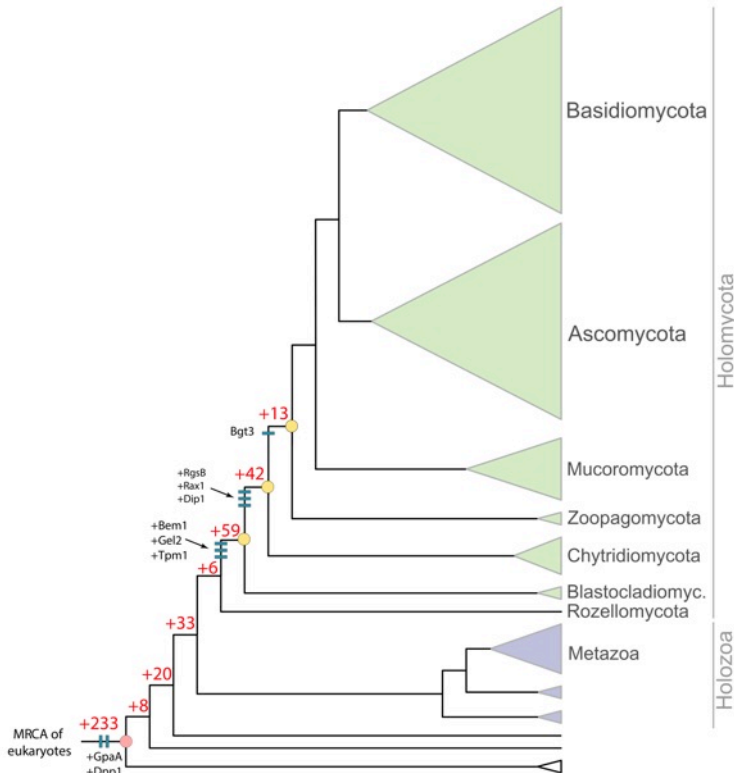

302  
303 Fig. 4. Origin of 414 gene families potentially related to the evolution of hyphal MC, identified by ANOVA  
304 ( $p < 0.05$ ). 114 families originated in BCZ nodes, including known morphogenesis related proteins (e.g.  
305 Bgt3, RgsB, Gel2 of *A. fumigatus*, Rax1, Bem1, Tpm1 and Dpp1 from *S. cerevisiae*, Dip1 from *S. pombe*)  
306 labelled as blue bars. Red numbers at branches represent the number of gene families originated at the  
307 backbone of the species tree.

### 308 The evolution of kinase, receptor and adhesive repertoires do not correlate 309 with hyphal multicellularity

310 The increased sophistication of cell-cell communication and adhesion pathways often correlates  
311 with expanded repertoires of genes encoding kinases, receptors and adhesive proteins<sup>83–85</sup>. We  
312 therefore, examined Ser/Thr kinase (954 clusters), hybrid histidine kinase (96 clusters), receptor  
313 (183 clusters) and adhesion (23 clusters) genes, focusing on the comparison of unicellular and  
314 filamentous fungi. Copy numbers across the 954 identified Ser/Thr kinase clusters were similar  
315 in unicellular and simple multicellular fungi, with higher kinase diversity found in complex  
316 multicellular Basidiomycota (as reported by Krizsan 2018)<sup>86</sup> and in *Rhizophagus irregularis* (Fig.  
317 5a). We inferred net contractions in BCZ nodes, from 572 to 529 reconstructed ancestral  
318 kinases (81 duplications, 124 losses, Fig. 5a). Nevertheless, kinase families that duplicated here  
319 include all 3 MAPK pathways in fungi, the mating pheromone, cell wall integrity (*fus3*, *kss1*,  
320 *kdx1* from *S. cerevisiae*, *mpkB* from *A. fumigatus*) and osmoregulatory pathways (*hog1*, *ssk2*,  
321 *ssk22* from *S. cerevisiae*, *sakA*, *sskB* from *A. fumigatus*), all of which indirectly regulate hyphal  
322 growth<sup>46–48</sup>.

323 Overall, fungi had fewer Ser/Thr kinases (mean 257) than metazoans (mean 643).  
324 However, the higher kinase diversity of metazoans seems to be a result of an early expansion in

325 the MRCA of Holomycota and Holozoa (Fig. 5a). While signal transduction requirements of  
326 metazoan MC have been mostly discussed in the context of receptor tyrosine kinases, we found  
327 no evidence for domain architectures typical of receptor tyrosine kinases in fungi. The only  
328 group resembling receptor kinases is hybrid histidine kinases (HK), that comprise proteins with  
329 a sensor domain, a histidine kinase domain and a C-terminal receiver domain that acts as a  
330 response regulator. We inferred an expansion (24 duplications, 10 losses) of HKs in the MRCA  
331 of the Chytridiomycota and other fungi, including class III and X HKs, which are linked to  
332 morphogenesis<sup>87,88</sup>. Another wave of HK expansion was inferred in the MRCA of Mucoromycota  
333 and Dikarya with 11 duplications and 4 losses (Supplementary Fig. 3).

334

335 In G-protein coupled receptors (GPCRs), an even more extreme difference was  
336 observed between fungi and metazoans (Fig. 5b). A large receptor expansion was observed in  
337 the latter, which resulted in 135-583 genes in extant animals. Out of the 183 analyzed GPCR  
338 families, only 19 were found in fungi, and only one of them was generally conserved across  
339 fungal species. This family contains STE3 and STE3-like  $\alpha$ -factor mating pheromone receptors,  
340 involved in pheromone-dependent signal transduction, cellular conjugation and cell fusion.

341

342 Adhesive cell surface proteins are key mediators of the transition to MC in colonial and  
343 aggregative lineages<sup>3,5,6</sup>, which is reflected in their higher copy numbers in multicellular  
344 organisms<sup>89</sup>. We identified 45 families of putative adhesion-related proteins in fungi, including  
345 adhesins, flocculins, hydrophobins, various lectins and glycosylphosphatidylinositol (GPI)-  
346 anchored cell wall proteins. Our reconstructions of the evolution of these families (Fig. 5c)  
347 revealed no expansion but a small contraction (from 17 to 14 copies) in BCZ nodes. Expansions  
348 were inferred in the Agaricomycotina and in Saccharomycotina yeasts (*C. albicans*, *P. stipitis*,  
349 *D. hansenii*). The expansion in the Agaricomycotina was driven by class1 hydrophobins and  
350 homologs of the *C. neoformans* Cfl1 (an adhesive protein with roles in signaling and  
351 morphogenesis regulation)<sup>90</sup>. Diversification of these families correlates with the evolution of  
352 fruiting bodies and probably reflects the emergence of complex multicellularity<sup>7</sup>. The higher copy  
353 numbers in yeast species relate to several yeast-specific adhesin and lectin-like cell wall  
354 proteins that contain experimentally characterized adhesive proteins of human pathogenic fungi  
355 (e.g. *Candida* spp.)<sup>91,92</sup>.

356

357 Taken together, the evolution of kinase, receptor and adhesive protein repertoires  
358 highlights an important difference between fungi and other multicellular lineages. We observed  
359 no significant expansion of such families in filamentous fungi, whereas kinase and adhesion  
360 related genes expanded in complex multicellular Agaricomycotina. This might be explained by  
361 the two-step nature of the evolution of complex MC in fungi<sup>7,93</sup> that proceeds through an  
362 intermediate complexity level, hyphal MC, as opposed to metazoans, where complex MC  
363 evolved in a more direct way<sup>14</sup>.

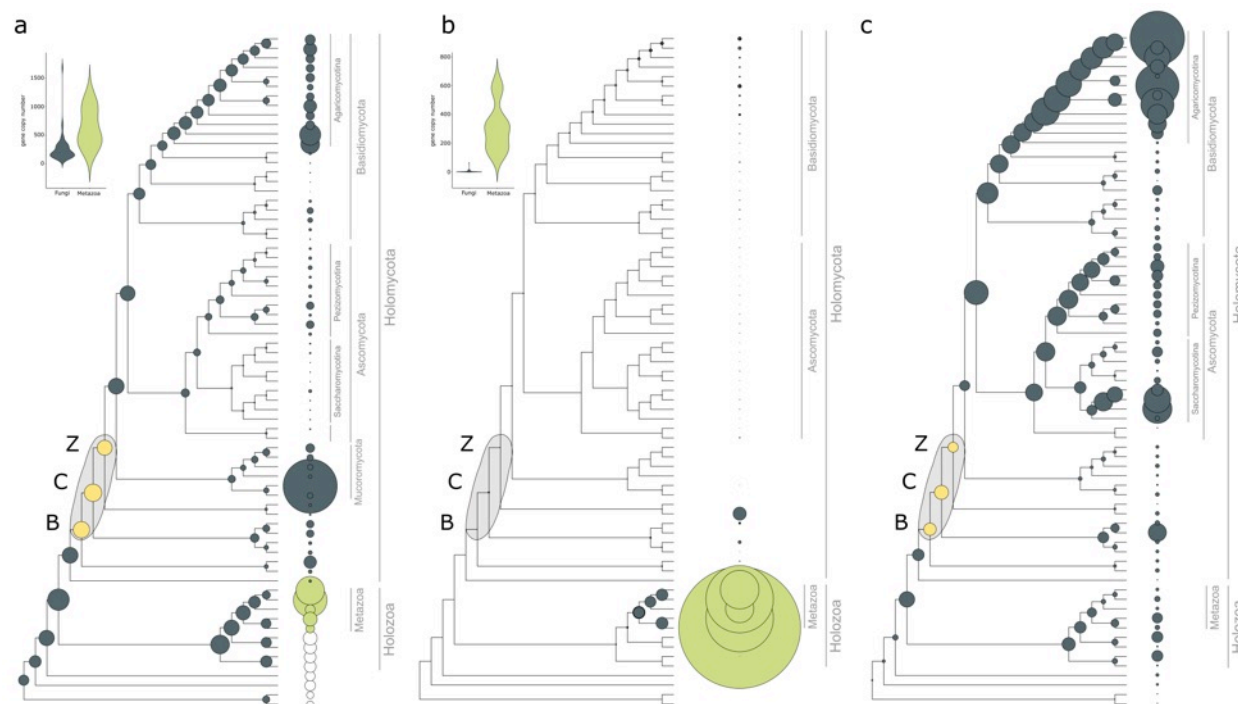

364  
 365 Fig. 5. Gene family evolution of Serine-Threonine kinases (a), transmembrane receptors (b) and  
 366 adhesion-related genes (c). BCZ nodes (yellow) represent the putative origin of hyphal MC. Bubble size  
 367 across the tree is proportional to reconstructed ancestral gene copy number and copy number of extant  
 368 species (shown right to the tree). Violin plots for kinases (a) and receptors (b) show copy number  
 369 distribution of gene families in multicellular fungi (grey) and metazoans (green).

### 370 Yeasts retain most genes required for hyphal morphogenesis

371 Yeasts are secondarily simplified organisms with reduced ability to form hyphae and that spend  
 372 most of their life cycle as unicells<sup>16,18,53,94</sup>. Our ancestral character state reconstructions imply  
 373 that yeasts derived from filamentous ancestors (Fig. 1a), and thus they represent a classic  
 374 example of reduced complexity. They were hypothesized to have lost MC<sup>95</sup>, even though  
 375 rudimentary forms of hyphal growth (termed pseudohyphae) exist in most species. We  
 376 scrutinized the fate of MC-related genes in five predominantly yeast-like lineages<sup>94</sup>, the  
 377 Saccharomycotina, Taphrinomycotina, Pucciniomycotina, Ustilaginomycotina and  
 378 Tremellomycotina. Because yeast genomes have undergone extreme streamlining during  
 379 evolution, we evaluated gene loss among MC-related genes in comparison to genome-wide  
 380 figures of gene loss.

381  
 382 Yeast species generally have fewer MC-related genes and reconstructions indicate more  
 383 losses than duplications along branches of yeast ancestors (Fig. 6). However, when we  
 384 corrected for genome-wide reductions in gene number, we found that hyphal morphogenesis  
 385 genes are underrepresented among lost genes compared to other functions (Fig. 6a,  
 386 Supplementary Table 7). Most groups of hyphal morphogenesis genes are significantly depleted  
 387 ( $P < 0.05$ , Fisher's exact test) among gene losses in yeast clades (except the  
 388 Ustilaginomycotina). We recovered only 6 cases where losses of MC-related genes were  
 389 significantly overrepresented ( $P < 0.05$ , Fisher's exact test, Supplementary Table 7), in proteins



390 related to adhesion and microtubule-based transport. Higher than expected loss rates in such  
391 proteins were observed in the Taphrinomycotina, Pucciniomycotina, Tremellomycotina and the  
392 Saccharomycotina, suggesting that microtubule-based transport and adhesion-related functions  
393 become dispensable for these yeasts clades. Losses in 'microtubule system' are particularly  
394 interesting from the perspective of long-range transport of vesicles and nuclei along hyphae.  
395 Microtubule system-related genes with reduced repertoires in yeasts include gamma-tubulin  
396 complex proteins, kinesins, dynactin, dynein heavy chain (*nudA*), and the dynactin linking  
397 protein *ro-2*<sup>96</sup>. Of the five yeast-like clades, the budding and fission yeast lineages show the  
398 most gene losses, consistent with the strongest reduction of hyphal growth abilities in these  
399 clades. A similar pattern was found for NADPH oxidases, which is consistent with previous  
400 reports: concurrent losses in all yeast-like clades, with complete loss of the family in the  
401 Saccharomycotina, Ustilaginomycotina, in *S. pombe* and *C. neoformans* (Supplementary Fig.  
402 4).

403  
404 Altogether 54-65% of MC-related genes were retained in yeast genomes  
405 (Supplementary Table 7). For example, hardly any reductions are observed in PI4,5P2 binding  
406 proteins (*Slm1*, *Slm2* in *S. cerevisiae*<sup>97</sup>), which are involved in the regulation of actin  
407 cytoskeleton organization and endosomal transport, or in class I myosins (*myoA* in *A.*  
408 *nidulans*<sup>98</sup>, *myo5* in *S. cerevisiae*<sup>99</sup>) which are localized to the site of polarized growth and  
409 involved in secretion and cell wall biogenesis.

410  
411 Collectively, these data suggest that hyphal morphogenesis genes in general are  
412 dispensable for yeasts to a smaller extent than genes with other functions. This is consistent  
413 with most yeast-like fungi being able to switch to hyphal or pseudohyphal growth under certain  
414 conditions. The fact that hyphal morphogenesis genes are not statistically significantly enriched  
415 among losses compared to genome-wide expectation, however, is not in conflict with a  
416 reduction of multicellular abilities in yeast-like fungi. These gene losses do indicate reductions in  
417 hyphal growth, although this cutback is smaller compared to other functions in the genome. This  
418 in turn suggests, that the ability for multicellular growth is among the functions preferentially  
419 retained by yeast-like fungi.

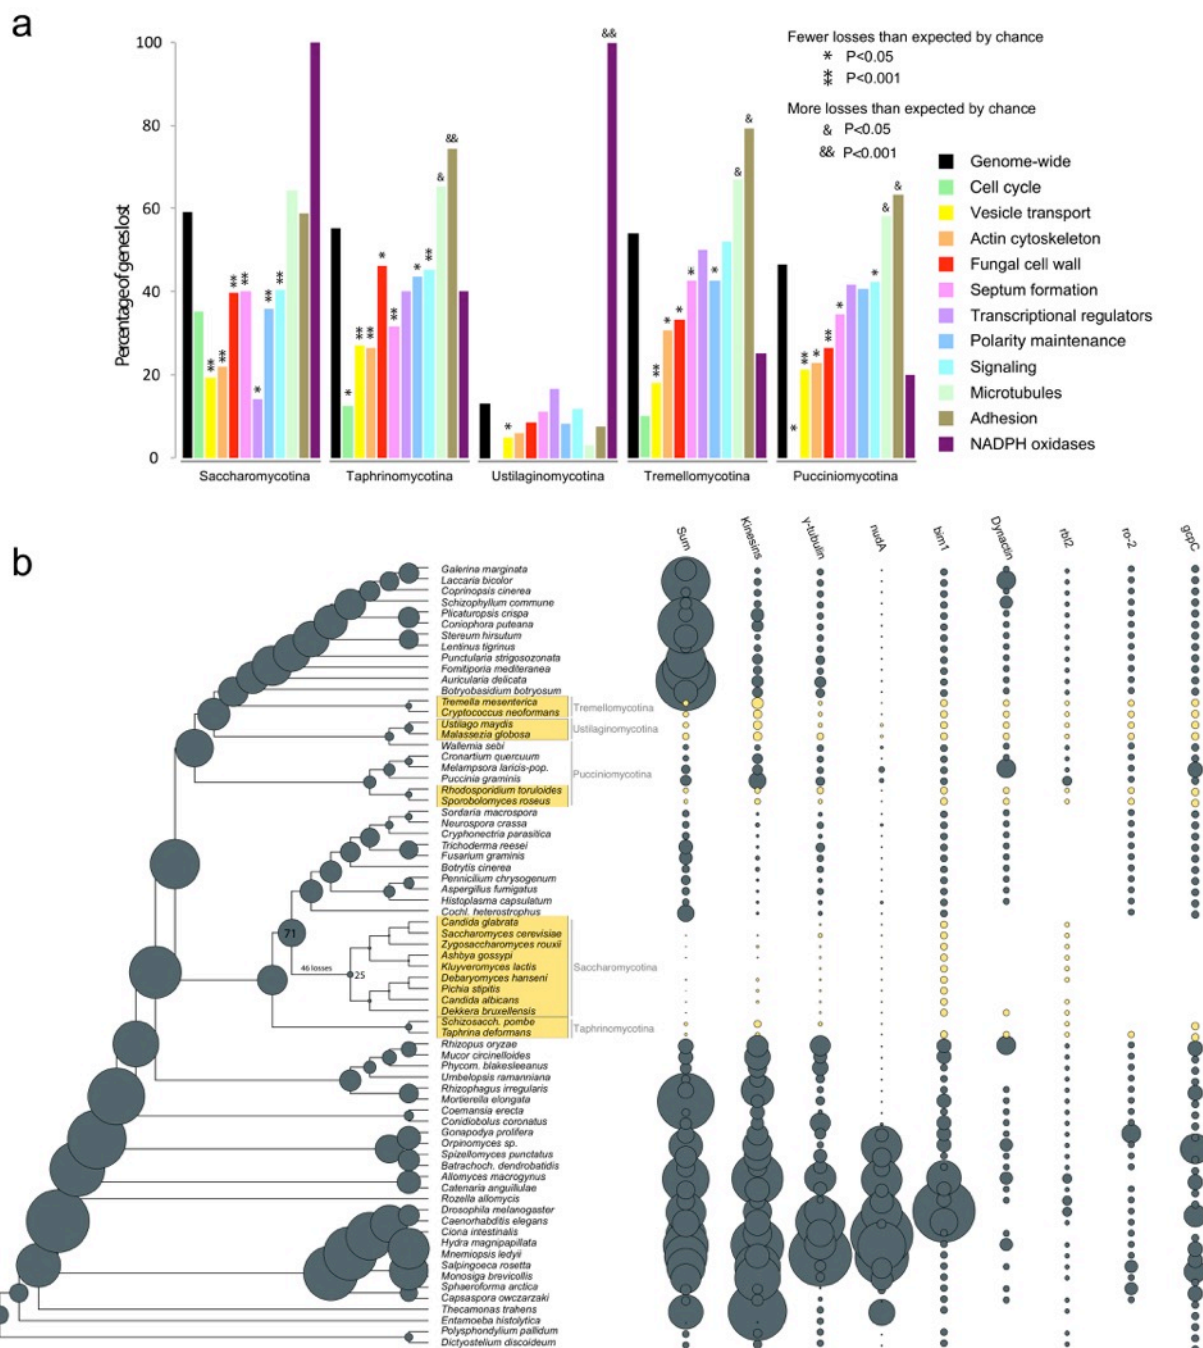

Fig. 6. Secondly simplified yeast-like fungi retain genes for hyphal MC. (a) the percentages of lost genes in main morphogenesis-related categories. Percentages were calculated relative to ancestral copy numbers inferred in the node preceding the origin of 5 yeast-like clades (Saccharomycotina, Taphrinomycotina, Pucciniomycotina, Ustilaginomycotina and Tremellomycotina). Significance of the enrichment of gene losses in each category relative to genome-wide figures of gene loss were determined by Fisher's exact test and is shown above bars. (b) ancestral gene copy number reconstruction of microtubule-based transport genes along the fungal phylogeny. Secondly simplified (yeast-like) clades are highlighted in yellow. Bubble size proportional to reconstructed ancestral and extant gene copy number across 19 gene families. Copy number distribution of each gene family is shown right to the tree.

## 431 Conclusions

432 We analyzed the genetic underpinnings of the evolution of fungal hyphae. Hyphae are among  
433 the most enigmatic fungal structures with a unique multicellular organization, yet their  
434 evolutionary origins remained poorly explored. Our ancestral character state reconstructions  
435 localized the origin of hyphae to three nodes around the split of Blastocladio-, Chytridio- and  
436 Zoopagomycota (BCZ nodes), consistent with previous studies<sup>17</sup> and potential convergence of  
437 hypha-like structures in these phyla.

438  
439 To understand how the underlying genetics evolved, we identified 362 gene families with  
440 known relevance to hyphal morphogenesis (e.g. from knockout studies) and predicted a link to  
441 hyphal MC for another 414 families using comparative genomics of 71 species. The  
442 evolutionary dynamics of these families shows a mixed picture. A large proportion of families  
443 are conserved in all sampled eukaryotes and show very little or no copy number dynamics at all  
444 at the origin of multicellular fungi. A second category comprises gene families with a deep  
445 eukaryotic origin that show duplications coincident with the evolution of hyphae. However, no  
446 families were found that had statistically significantly elevated number of duplications in BCZ  
447 nodes, indicating limited evolutionary novelty in these nodes. In the third category there are  
448 gene families whose origin mapped to BCZ nodes (RGSs, formins, APSES and Bem1 families).  
449 Such gene families could have evolved *de novo* or diverged in sequence so much that similarity  
450 is not detectable to homologous non-fungal sequences. We find candidates for both scenarios.  
451 For example, the MedA or APSES families contain fungal-specific protein domains; these have  
452 conceivably evolved in early fungi and represent fungal-specific innovations. On the other hand,  
453 the detected formin and RGS families contained only fungal genes, but their characteristic  
454 Interpro domains occur outside of fungi too, possibly reflecting common ancestry, with evidence  
455 for homology blurred by sequence divergence.

456  
457 We found that several multicellularity-related genes predate the emergence of hyphal  
458 MC and were co-opted for hyphal growth during evolution, which mirrors patterns observed in  
459 multicellular animals and plants<sup>6,100,101</sup>. Such observations rise to the hypothesis that in terms of  
460 genetic novelty, transitions to multicellularity represent a minor rather than a major evolutionary  
461 step<sup>102</sup>, an idea that finds support in the observations made here on fungi. Cell polarity  
462 maintenance, vesicle trafficking and cytoskeletal systems of unicellular eukaryotes may have  
463 turned out to be useful functions in hyphal MC, on which the extreme polarized growth of fungal  
464 hyphae could have built during evolution. The phagocytotic machinery was probably exapted for  
465 hyphal MC: its original function was most likely lifted by the emergence of a rigid cell wall in  
466 early fungi, which probably made the underlying genes dispensable. However, instead of being  
467 lost over time, its components got incorporated into hyphal MC.

468  
469 Finally, beyond gene family events, certainly other genetic mechanisms (e.g. changes in  
470 amino acid sequence and domain composition, changes to biophysical properties of genes) also  
471 contributed to the evolution of hyphae. Our analyses of gene architecture revealed significant  
472 differences between MC-related genes of unicellular and multicellular fungi, indicating that  
473 changes in CDS length or intron content are also relevant for the emergence of hyphal MC<sup>103</sup>.

474 Reports of sequence-level changes and domain shuffling in connection with the evolution of  
475 hyphal MC have also been published. There is evidence for fungal kinesins being 2x more  
476 processive than other eukaryotic kinesins<sup>104</sup> - probably in response to needs of long range  
477 transport along the hyphal axis. Similarly, class V and VII chitin synthases gained a myosin  
478 motor domain in early fungi, providing higher efficiency in polarized chitin synthesis<sup>105-107</sup>.

479

480 Taken together, our results suggest that multiple mechanisms probably contributed to  
481 the evolution of hyphal MC, including changes in gene structure, gene duplications, *de novo*  
482 gene family birth, and co-option/neofunctionalization. Compared to other multicellular lineages,  
483 the evolution of fungi shows several unique patterns. While the expansion of adhesion and  
484 signal transduction mechanisms is shared by most colonial and aggregative multicellular  
485 lineages examined so far<sup>3,9,19,108-110</sup>, we did not find evidence for this in fungi. This could be  
486 explained by the peculiar life history of fungal hyphae, which shares similarity with only  
487 Oomycota. While adhesion might not be key in vegetative hyphae, there is plenty of evidence  
488 for active communication between neighboring hyphae<sup>111-113</sup>. It is possible that the main modes  
489 of communication in fungal hyphae are not linked to cell surface receptors, might be related to  
490 volatiles (such as farnesol<sup>80,114,115</sup>) or are not known yet. These observations suggest that  
491 multicellularity in fungi differs considerably from that in other lineages and raises the possibility  
492 that hyphal MC should be considered a third, qualitatively different way in addition to the  
493 aggregative and clonal modes of evolving MC. Subjective categorizations aside, hyphal MC  
494 represents a highly successful adaptation to terrestrial life and comparative genomics opens the  
495 door for discussions on whether major phenotypic transitions represent - in terms of genetic  
496 novelty - a major or a minor transition.

497

## 498 Methods

### 499 Organismal phylogeny

500 We assembled a dataset containing whole proteomes of 71 species and performed all-vs-all  
501 blast using mpiBLAST 1.6.0<sup>116</sup>. We omitted Microsporidia from the dataset due to the high rate  
502 of evolution of this group. Proteins were clustered into gene families with Markov Cluster  
503 Algorithm (MCL)<sup>117</sup> with an inflation parameter of 2.0. Clusters with at least 50% taxon  
504 occupancy were chosen and were aligned by PRANK 140603<sup>118</sup> while trimAl 1.4.rev15<sup>119</sup> was  
505 used to remove poorly aligned regions from the multiple sequence alignments using the  
506 parameter -gt 0.2. Approximately-maximum-likelihood gene trees were inferred by FastTree<sup>120</sup>  
507 using the LG+CAT model (-lg -cat20), and the option -gamma to compute a Gamma20-based  
508 likelihoods. Using a custom-made Perl script we excluded gene trees with deep paralogs to  
509 identify single-copy genes. Alignments of single-copy gene clusters were concatenated into a  
510 supermatrix and a species tree was estimated using RAxML 8.2.4<sup>121</sup> under the  
511 PROTGAMMAWAG model. The model was partitioned by gene. Bootstrapping was performed  
512 on the dataset in 100 replicates.

513

### 514 Ancestral character state reconstructions



515 The 71 species were coded for their ability to form hyphae, either as hyphal or non-hyphal.  
516 Species that could not be unambiguously assigned to hyphal or non-hyphal (*Catenaria*  
517 *anguillulae*) and those with the ability to grow either as hyphae or unicells (most yeasts) were  
518 coded as uncertain. Bayesian MCMC reconstruction of ancestral character states was  
519 performed under the threshold model<sup>122</sup> using Bayesian MCMC with the “ancThresh” function in  
520 phytools v0.6-60<sup>123</sup> in R<sup>124</sup>. The number of generations for MCMC was set to 1,000,000, and the  
521 method “mcmc” was used with the Brownian motion as the model for the evolution of the  
522 liability. Burn-in parameter was set to default. Convergence was checked by inspecting  
523 likelihood values through time.

524

### 525 **Analyses of Gene family evolution**

526 To investigate the evolutionary dynamics of gene families containing hyphal morphogenesis-  
527 related genes, we performed all-vs-all blast (NCBI Blast 2.7.1+) <sup>125</sup> for proteomes of the 71  
528 species and did sequence similarity-based protein clustering by following the MCL clustering  
529 protocol<sup>117</sup> used by Ohm et al 2012<sup>126</sup>. The resulting protein clusters were aligned by PRANK  
530 140603<sup>118</sup> with default parameters, and ambiguously aligned regions were removed using trimAl  
531 1.4.rev15<sup>119</sup> with the argument -gt 0.2. MAFFT v7.222<sup>127</sup> (option --auto) was used as an  
532 alternative alignment tool for clusters that could not be aligned by PRANK due to computational  
533 limitations (80 out of 34032 clusters). Maximum Likelihood inference of gene trees and  
534 calculation of Shimodaira-Hasegawa-like branch support values were carried out in RAxML  
535 8.2.4<sup>128</sup> under the PROTGAMMAWAG model of protein evolution. The calculated SH-like  
536 branch support values were used in gene tree-species tree reconciliation in Notung-2.9<sup>129</sup>. An  
537 edge-weight threshold of 0.9 was used, as SH-like support values are usually less conservative  
538 than ML bootstrap values (where 70% is usually taken as indication of strong support).  
539 Reconciliation was performed on the maximum likelihood gene trees and the ML species tree  
540 for the 71 species as input. We reconstructed the gene duplication/loss dynamics of gene  
541 families along the species tree using respective scripts from the COMPARE pipeline<sup>94,130</sup>. The  
542 numbers of gains and losses for each gene family and for each branch of the species tree were  
543 recorded and mapped on the species tree. Ancestral gene copy numbers were calculated for  
544 every internal node, summing the mapped duplications and losses across the species tree.  
545 Mappings were generated for each of the functional groups and also for kinases, adhesion-  
546 related proteins, receptors as well as for all gene families across the 71 genomes.

547

548 To test if genes related to hyphal MC experience an episode of increased duplication  
549 rate in nodes where hyphal growth putatively originated (BCZ nodes), we performed gene  
550 duplication enrichment analysis for each of the 362 families and for functional groups. To test if  
551 a cluster or a functional group shows significantly more or less duplications than expected by  
552 chance in BCZ nodes, we run two-tailed Fisher’s exact tests ( $p < 0.05$ ). We compared the  
553 number of duplications mapped to BCZ nodes for a given gene family to the genome-wide  
554 number of duplications in BCZ nodes, using total number of duplications across the tree as a  
555 reference.

556

### 557 **Analyses of key multicellularity-related genes**

558 The above strategy was used to reconstruct the evolution of kinase, receptor and adhesion-  
559 related gene families. Protein clusters containing kinase genes, both serine-threonine kinases  
560 and histidine kinases, were collected based on InterPro domains. Identification of serine-  
561 threonine kinases and histidine kinases followed Park et al 2011<sup>131</sup> and Herivaux et al 2016<sup>88</sup>,  
562 respectively. Classification of histidine kinases followed Defosse et al<sup>87</sup>.

563  
564 Families of adhesive proteins were identified based on experimentally characterized  
565 genes collected from the literature. We identified 45 genes, which mostly grouped into  
566 flocculins, lectins, hydrophobins and other (GPI)-modified cell wall adhesins. We identified  
567 receptor genes based on InterPro domains that are annotated with the gene ontology term  
568 'receptor activity' (but not 'receptor binding' or other terms indicative of indirect relationships to  
569 receptor function), resulting in 27 IPR terms (IPR000161, IPR000276, IPR000337, IPR000363,  
570 IPR000366, IPR000481, IPR000832, IPR000848, IPR001103, IPR001105, IPR001499,  
571 IPR001546, IPR001946, IPR002011, IPR002185, IPR002280, IPR002455, IPR002456,  
572 IPR003110, IPR003292, IPR003980, IPR003982, IPR005386, IPR006211, IPR017978,  
573 IPR017979, IPR017981).

#### 574 575 **Analyses of phagocytosis-related genes**

576 We collected information on phagocytosis-related genes from recent reviews on  
577 *Dictyostelium*<sup>65,66</sup>, identified the corresponding genes of this species in our dataset and the  
578 protein clusters that contained homologs of the identified genes. Mapping of gene duplications  
579 and losses along the species tree was done as described above.

#### 580 581 **Genome-wide screen for putative hyphal multicellularity-related gene families**

582 To identify gene families with increased rates of gene duplication coinciding with the origin of  
583 hyphal MC, we set up a pipeline that tests for higher than expected rate of duplication in nodes  
584 of the species tree to which the origin of hyphae could be located (BCZ nodes). For each gene  
585 family, gene duplication rates in BCZ nodes were compared to duplication rates of the same  
586 family in other parts of the species tree (nodes before and after BCZ nodes). Gene duplication  
587 rates were computed by dividing the number of reconstructed duplications for a given branch by  
588 the length of that branch using a custom Perl script. Terminal duplications and duplications  
589 mapped to metazoan ancestors were excluded from the analysis. The resulting  
590 node×duplication rate matrix was analyzed by a two-factor permutation ANOVA<sup>132</sup> with degrees  
591 of freedom DFT=2, in R, with  $P < 0.05$  considered as significant. We further required that the  
592 detected clusters be conserved ( $\geq 1$  copy) in at least 70% of filamentous fungi.

#### 593 594 **Analyses of gene losses in yeast-like fungi**

595 We analyzed gene losses in five yeast-like lineages by comparing the number of losses  
596 genome-wide, to the numbers of losses in hyphal morphogenesis related genes (actin  
597 cytoskeleton regulation, polarity maintenance, cell wall biogenesis/remodelling, septation and  
598 septal plugging, signal transduction, transcriptional regulation, vesicle transport, microtubule-  
599 based transport and cell cycle regulation) relative to ancestral copy numbers. P-values were  
600 calculated by Fisher's exact test, with  $P < 0.05$  considered as significant. The percentage of  
601 genes retained in yeast genomes was calculated for every functional category by comparing

602 ancient gene-copy number prior to the emergence of yeast-like lineages to the average gene  
603 copy-number of terminals.

604

### 605 **Statistical analysis of genomic features**

606 An R script (available upon request) was written to generate coding sequence (CDS)/intron  
607 statistics (strand, order, length, count) based on genome annotations of the 71 species. CDS  
608 feature coordinates for each gene were extracted and subsequently used to calculate intron  
609 coordinates. Statistical significance of the differences between the gene, CDS and intron  
610 lengths of 4 unicellular and 39 multicellular fungi was investigated by independent two-tailed  
611 Welch's t-test with pooled variance estimation (`var.equal=FALSE`), using the `t.test` function in R.

### 612 **Data availability**

613 Files associated with this paper (including gene and species trees, gene duplication/loss  
614 catalogs) have been deposited in Dryad (Accession number, *to be provided upon publication*).

### 615 **Acknowledgements**

616 The authors are thankful to Sándor Kocsubé for his help in crafting figures. This work was  
617 supported by the 'Momentum' program of the Hungarian Academy of Sciences (contract No.  
618 LP2014/12 to L.G.N.) and the European Research Council (grant no. 758161 to L.G.N.). E.K.  
619 acknowledges support from the National Talent Program of the Ministry of Human Capacities  
620 (contract No. NTP-NFTÖ-16-0566) and the Young Researchers Program of the Hungarian  
621 Academy of Sciences. N.T. acknowledges support from Japan Society for the Promotion of  
622 Science (JSPS) KAKENHI (grant number: 18K05545) and Japan Science and Technology  
623 Agency (JST) ERATO (grant number: JPMJER1502).

### 624 **Author contributions**

625 E.K. and N.G.L. conceived the study. E.K. collected literature data on morphogenesis-related  
626 genes. E.K. and A.N.P. inferred species trees, B.B. performed clustering, E.K., K.K., T.K., Z.M.  
627 and T.V. analyzed gene family evolution. B.H. analyzed gene structural changes. E.K., M.R.,  
628 N.T. and N.G.L. interpreted the results and wrote the paper. All authors have read and  
629 commented on the manuscript.

### 630 **Competing interests**

631 The authors declare no competing interests.

### 632 **References**

- 633 1. Szathmáry, E. Toward major evolutionary transitions theory 2.0. *Proc. Natl. Acad. Sci. U.*  
634 *S. A.* **112**, 10104–11 (2015).
- 635 2. Rokas, A. The Origins of Multicellularity and the Early History of the Genetic Toolkit For

- 636 Animal Development. *Annu. Rev. Genet.* **42**, 235–251 (2008).
- 637 3. Abedin, M. & King, N. Diverse evolutionary paths to cell adhesion. *Trends Cell Biol.* **20**,  
638 734–42 (2010).
- 639 4. Coates, J. C., Aiman, U.-E. & Charrier, B. Understanding “green” multicellularity:  
640 do seaweeds hold the key? *Front. Plant Sci.* **5**, 737 (2015).
- 641 5. Brunet, T. & King, N. The Origin of Animal Multicellularity and Cell Differentiation. *Dev*  
642 *Cell* **43**, 124–140 (2017).
- 643 6. Seb e-Pedr s, A., Degnan, B. M. & Ruiz-Trillo, I. The origin of Metazoa: a unicellular  
644 perspective. *Nat. Rev. Genet.* **18**, 498–512 (2017).
- 645 7. Nagy, L. G., Kov acs, G. M. & Krizs n, K. Complex multicellularity in fungi: evolutionary  
646 convergence, single origin, or both? *Biol. Rev.* (2018). doi:10.1111/brv.12418
- 647 8. Brown, M. W., Spiegel, F. W. & Silberman, J. D. Phylogeny of the “Forgotten”  
648 Cellular Slime Mold, *Fonticula alba*, Reveals a Key Evolutionary Branch within  
649 Opisthokonta. *Mol. Biol. Evol.* **26**, 2699–2709 (2009).
- 650 9. Seb e-Pedr s, A. *et al.* Regulated aggregative multicellularity in a close unicellular relative  
651 of metazoa. *Elife* **2**, e01287 (2013).
- 652 10. Gl ockner, G. *et al.* The multicellularity genes of dictyostelid social amoebas. *Nat.*  
653 *Commun.* **7**, 12085 (2016).
- 654 11. Ruiz-Trillo, I. *et al.* The origins of multicellularity: a multi-taxon genome initiative. *Trends*  
655 *Genet.* **23**, 113–118 (2007).
- 656 12. Fairclough, S. R. *et al.* Premetazoan genome evolution and the regulation of cell  
657 differentiation in the choanoflagellate *Salpingoeca rosetta*. *Genome Biol.* **14**, R15 (2013).
- 658 13. Blackwell, M. The Fungi: 1, 2, 3 ... 5.1 million species? *Am. J. Bot.* **98**, 426–438 (2011).
- 659 14. Niklas, K. J. & Newman, S. A. The origins of multicellular organisms. *Evol. Dev.* **15**, 41–  
660 52 (2013).
- 661 15. Harris, S. D. Branching of fungal hyphae: regulation, mechanisms and comparison with  
662 other branching systems. *Mycologia* **100**, 823–832 (2008).
- 663 16. Stajich, J. E. *et al.* The Fungi. *Curr. Biol.* **19**, R840–R845 (2009).
- 664 17. Dee, J. M., Mollicone, M., Longcore, J. E., Roberson, R. W. & Berbee, M. L. Cytology and  
665 molecular phylogenetics of Monoblepharidomycetes provide evidence for multiple  
666 independent origins of the hyphal habit in the Fungi. *Mycologia* **107**, 710–728 (2015).
- 667 18. Nagy, L. G. *et al.* Six Key Traits of Fungi: Their Evolutionary Origins and Genetic Bases.  
668 in *The Fungal Kingdom* **5**, 35–56 (American Society of Microbiology, 2017).
- 669 19. Seb e-Pedr s, A., Degnan, B. M. & Ruiz-Trillo, I. The origin of Metazoa: A unicellular  
670 perspective. *Nature Reviews Genetics* **18**, 498–512 (2017).
- 671 20. Svedberg, J. *et al.* Convergent evolution of complex genomic rearrangements in two  
672 fungal meiotic drive elements. *Nat. Commun.* **9**, 4242 (2018).
- 673 21. Fricker, M. D., Heaton, L. L. M., Jones, N. S. & Boddy, L. The Mycelium as a Network.  
674 *Microbiol. Spectr.* **5**, (2017).
- 675 22. Richards, T. A., Leonard, G. & Wideman, J. G. What Defines the “Kingdom”  
676 Fungi? *Microbiol. Spectr.* **5**, (2017).
- 677 23. Sekimoto, S., Rochon, D., Long, J. E., Dee, J. M. & Berbee, M. L. A multigene phylogeny  
678 of *Olpidium* and its implications for early fungal evolution. *BMC Evol. Biol.* **11**, 331 (2011).
- 679 24. Ryan, O. *et al.* Global gene deletion analysis exploring yeast filamentous growth. *Science*  
680 **337**, 1353–6 (2012).
- 681 25. Stajich, J. E. *et al.* Insights into evolution of multicellular fungi from the assembled  
682 chromosomes of the mushroom *Coprinopsis cinerea* (*Coprinus cinereus*). *Proc. Natl.*  
683 *Acad. Sci. U. S. A.* **107**, 11889–94 (2010).
- 684 26. K es, U., Khonsuntia, W. & Subba, S. Complex fungi. *Fungal Biol. Rev.* **32**, 205–218  
685 (2018).
- 686 27. P ggeler, S., Nowrousian, M., Teichert, I., Beier, A. & K ck, U. Fruiting-Body



- 687 Development in Ascomycetes. in *Physiology and Genetics* 1–56 (Springer International  
688 Publishing, 2018). doi:10.1007/978-3-319-71740-1\_1
- 689 28. Knoll, A. H. The Multiple Origins of Complex Multicellularity. *Earth Planet. Sci.* **39**, 217–  
690 239 (2011).
- 691 29. Verstrepen, K. J., Reynolds, T. B. & Fink, G. R. Origins of variation in the fungal cell  
692 surface. *Nat. Rev. Microbiol.* **2**, 533–540 (2004).
- 693 30. King, N., Hittinger, C. T. & Carroll, S. B. Evolution of Key Cell Signaling and Adhesion  
694 Protein Families Predates Animal Origins. *Science (80-. )*. **301**, 361–363 (2003).
- 695 31. Miller, W. T. Tyrosine kinase signaling and the emergence of multicellularity. *Biochim.*  
696 *Biophys. Acta - Mol. Cell Res.* **1823**, 1053–1057 (2012).
- 697 32. Mendoza, A. de *et al.* Transcription factor evolution in eukaryotes and the assembly of  
698 the regulatory toolkit in multicellular lineages. *Proc. Natl. Acad. Sci.* **110**, E4858–E4866  
699 (2013).
- 700 33. Harris, S. D. *et al.* Polarisome meets Spitzenkörper: microscopy, genetics, and genomics  
701 converge. *Eukaryot. Cell* **4**, 225–9 (2005).
- 702 34. Steinberg, G. Hyphal growth: a tale of motors, lipids, and the Spitzenkörper. *Eukaryot.*  
703 *Cell* **6**, 351–60 (2007).
- 704 35. Sudbery, P. E. Regulation of polarised growth in fungi. *Fungal Biol. Rev.* **22**, 44–55  
705 (2008).
- 706 36. Harris, S. D. *et al.* Morphology and development in *Aspergillus nidulans*: A complex  
707 puzzle. *Fungal Genet. Biol.* **46**, S82–S92 (2009).
- 708 37. Steinberg, G., Peñalva, M. A., Riquelme, M., Wosten, H. & Harris, S. D. Cell Biology of  
709 Hyphal Growth. *Microbiol. Spectr.* **5**, 1–34 (2017).
- 710 38. Riquelme, M. *et al.* Fungal Morphogenesis, from the Polarized Growth of Hyphae to  
711 Complex Reproduction and Infection Structures. *Microbiol. Mol. Biol. Rev.* **82**, e00068-17  
712 (2018).
- 713 39. Fischer, R., Zekert, N. & Takeshita, N. Polarized growth in fungi – interplay between the  
714 cytoskeleton, positional markers and membrane domains. *Mol. Microbiol.* **68**, 813–826  
715 (2008).
- 716 40. Schultzhau, Z. S. & Shaw, B. D. Endocytosis and exocytosis in hyphal growth. *Fungal*  
717 *Biol. Rev.* **29**, 43–53 (2015).
- 718 41. Schuster, M. *et al.* Co-delivery of cell-wall-forming enzymes in the same vesicle for  
719 coordinated fungal cell wall formation. *Nat. Microbiol.* **1**, 16149 (2016).
- 720 42. Momany, M. Polarity in filamentous fungi: establishment, maintenance and new axes.  
721 *Curr. Opin. Microbiol.* **5**, 580–585 (2002).
- 722 43. Virag, A. & Harris, S. D. The Spitzenkörper: a molecular perspective. *Mycol. Res.* **110**, 4–  
723 13 (2006).
- 724 44. Wendland, J. Comparison of Morphogenetic Networks of Filamentous Fungi and Yeast.  
725 *Fungal Genet. Biol.* **34**, 63–82 (2001).
- 726 45. Palecek, S. P., Kron, S. J. & Parikh, A. S. Sensing, signalling and integrating physical  
727 processes during *Saccharomyces cerevisiae* invasive and filamentous growth.  
728 *Microbiology* **148**, 893–907 (2002).
- 729 46. Bahn, Y.-S. *et al.* Sensing the environment: lessons from fungi. *Nat. Rev. Microbiol.* **5**,  
730 57–69 (2007).
- 731 47. Biswas, S., Van Dijck, P. & Datta, A. Environmental sensing and signal transduction  
732 pathways regulating morphopathogenic determinants of *Candida albicans*. *Microbiol. Mol.*  
733 *Biol. Rev.* **71**, 348–76 (2007).
- 734 48. Román, E., Arana, D. M., Nombela, C., Alonso-Monge, R. & Pla, J. MAP kinase  
735 pathways as regulators of fungal virulence. *Trends Microbiol.* **15**, 181–190 (2007).
- 736 49. Sudbery, P. E. Growth of *Candida albicans* hyphae. *Nat. Rev. Microbiol.* **9**, 737–748  
737 (2011).

- 738 50. Berbee, M. L., James, T. Y. & Strullu-Derrien, C. Early Diverging Fungi: Diversity and  
739 Impact at the Dawn of Terrestrial Life. *Annu. Rev. Microbiol.* **71**, 41–60 (2017).
- 740 51. Strullu-Derrien, C. *et al.* New insights into the evolutionary history of Fungi from a 407 Ma  
741 Blastocladiomycota fossil showing a complex hyphal thallus. *Philos. Trans. R. Soc. B*  
742 *Biol. Sci.* **373**, 20160502 (2018).
- 743 52. Redecker, D., Kodner, R. & Graham, L. E. Glomalean fungi from the Ordovician. *Science*  
744 **289**, 1920–1 (2000).
- 745 53. Harris, S. D. Hyphal morphogenesis: an evolutionary perspective. *Fungal Biol.* **115**, 475–  
746 484 (2011).
- 747 54. Powell, M. J. Blastocladiomycota. in *Handbook of the Protists* 1497–1521 (Springer  
748 International Publishing, 2017). doi:10.1007/978-3-319-28149-0\_17
- 749 55. Chang, Y. *et al.* Phylogenomic Analyses Indicate that Early Fungi Evolved Digesting Cell  
750 Walls of Algal Ancestors of Land Plants. *Genome Biol. Evol.* **7**, 1590–1601 (2015).
- 751 56. Spatafora, J. W. *et al.* The Fungal Tree of Life: From Molecular Systematics to Genome-  
752 Scale Phylogenies. in *The Fungal Kingdom* **5**, 3–34 (American Society of Microbiology,  
753 2017).
- 754 57. Ahrendt, S. R. *et al.* Leveraging single-cell genomics to expand the fungal tree of life. *Nat.*  
755 *Microbiol.* **3**, 1417–1428 (2018).
- 756 58. Spatafora, J. W. *et al.* A phylum-level phylogenetic classification of zygomycete fungi  
757 based on genome-scale data. *Mycologia* **108**, 1028–1046 (2016).
- 758 59. Gravelat, F. N. *et al.* *Aspergillus fumigatus* MedA governs adherence, host cell  
759 interactions and virulence. *Cell. Microbiol.* **12**, 473–488 (2010).
- 760 60. Zhao, Y. *et al.* The APSES family proteins in fungi: Characterizations, evolution and  
761 functions. *Fungal Genet. Biol.* **81**, 271–280 (2015).
- 762 61. Lichius, A., Yáñez-Gutiérrez, M. E., Read, N. D. & Castro-Longoria, E. Comparative Live-  
763 Cell Imaging Analyses of SPA-2, BUD-6 and BNI-1 in *Neurospora crassa* Reveal Novel  
764 Features of the Filamentous Fungal Polarisome. *PLoS One* **7**, e30372 (2012).
- 765 62. Bender, A. & Pringle, J. R. Use of a screen for synthetic lethal and multicopy suppressor  
766 mutants to identify two new genes involved in morphogenesis in *Saccharomyces*  
767 *cerevisiae*. *Mol. Cell. Biol.* **11**, 1295–305 (1991).
- 768 63. Madden, K. & Snyder, M. CELL POLARITY AND MORPHOGENESIS IN BUDDING  
769 YEAST. *Annu. Rev. Microbiol.* **52**, 687–744 (1998).
- 770 64. Fujita, A. *et al.* Rax1, a protein required for the establishment of the bipolar budding  
771 pattern in yeast. *Gene* **327**, 161–169 (2004).
- 772 65. Bozzaro, S., Bucci, C. & Steinert, M. Chapter 6 Phagocytosis and Host–Pathogen  
773 Interactions in *Dictyostelium* with a Look at Macrophages. in *International review of cell*  
774 *and molecular biology* **271**, 253–300 (2008).
- 775 66. Rivero, F. Endocytosis and the Actin Cytoskeleton in *Dictyostelium discoideum*. *Int. Rev.*  
776 *Cell Mol. Biol.* **267**, 343–397 (2008).
- 777 67. Mao, Y. & Finnemann, S. C. Regulation of phagocytosis by Rho GTPases. *Small*  
778 *GTPases* **6**, 89 (2015).
- 779 68. May, R. C., Caron, E., Hall, A. & Machesky, L. M. Involvement of the Arp2/3 complex in  
780 phagocytosis mediated by FcγR or CR3. *Nat. Cell Biol.* **2**, 246–248 (2000).
- 781 69. Epp, E. *et al.* Forward genetics in *Candida albicans* that reveals the Arp2/3 complex is  
782 required for hyphal formation, but not endocytosis. *Mol. Microbiol.* **75**, 1182–1198 (2010).
- 783 70. Hope, H., Bogliolo, S., Arkowitz, R. A. & Bassilana, M. Activation of Rac1 by the Guanine  
784 Nucleotide Exchange Factor Dck1 Is Required for Invasive Filamentous Growth in the  
785 Pathogen *Candida albicans*. *Mol. Biol. Cell* **19**, 3638–3651 (2008).
- 786 71. Torruella, G. *et al.* Global transcriptome analysis of the aphelid *Paraphelidium tribonemae*  
787 supports the phagotrophic origin of fungi. *Commun. Biol.* **1**, 231 (2018).
- 788 72. Kollmar, M., Lbik, D. & Enge, S. Evolution of the eukaryotic ARP2/3 activators of the

- 789 WASP family: WASP, WAVE, WASH, and WHAMM, and the proposed new family  
790 members WAWH and WAML. *BMC Res. Notes* **5**, 88 (2012).
- 791 73. Chen, T. *et al.* Multigenerational Cortical Inheritance of the Rax2 Protein in Orienting  
792 Polarity and Division in Yeast. *Science (80-. )*. **290**, 1975–1978 (2000).
- 793 74. Gonía, S. *et al.* Rax2 is important for directional establishment of growth sites, but not for  
794 reorientation of growth axes, during *Candida albicans* hyphal morphogenesis. *Fungal*  
795 *Genet. Biol.* **56**, 116–24 (2013).
- 796 75. Choi, E., Lee, K. & Song, K. Function of rax2p in the polarized growth of fission yeast.  
797 *Mol. Cells* **22**, 146–53 (2006).
- 798 76. Borkovich, K. A. *et al.* Lessons from the genome sequence of *Neurospora crassa*: tracing  
799 the path from genomic blueprint to multicellular organism. *Microbiol. Mol. Biol. Rev.* **68**,  
800 1–108 (2004).
- 801 77. Corrochano, L. M. *et al.* Expansion of Signal Transduction Pathways in Fungi by  
802 Extensive Genome Duplication. *Curr. Biol.* **26**, 1577–1584 (2016).
- 803 78. Basu, R. & Chang, F. Characterization of Dip1p Reveals a Switch in Arp2/3-Dependent  
804 Actin Assembly for Fission Yeast Endocytosis. *Curr. Biol.* **21**, 905–916 (2011).
- 805 79. Wagner, A. R., Luan, Q., Liu, S.-L. & Nolen, B. J. Dip1 defines a class of Arp2/3 complex  
806 activators that function without preformed actin filaments. *Curr. Biol.* **23**, 1990–8 (2013).
- 807 80. Nickerson, K. W., Atkin, A. L. & Hornby, J. M. Quorum Sensing in Dimorphic Fungi:  
808 Farnesol and Beyond. *Appl. Environ. Microbiol.* **72**, 3805–3813 (2006).
- 809 81. Beaulieu, J. M. & O’Meara, B. C. Detecting Hidden Diversification Shifts in Models of  
810 Trait-Dependent Speciation and Extinction. *Syst. Biol.* **65**, 583–601 (2016).
- 811 82. Richards, T. A. & Talbot, N. J. Osmotrophy. *Curr. Biol.* **28**, R1179–R1180 (2018).
- 812 83. Lim, W. A. & Pawson, T. Phosphotyrosine Signaling: Evolving a New Cellular  
813 Communication System. *Cell* **142**, 661–667 (2010).
- 814 84. Suga, H. *et al.* Genomic survey of premetazoans shows deep conservation of  
815 cytoplasmic tyrosine kinases and multiple radiations of receptor tyrosine kinases. *Sci.*  
816 *Signal.* **5**, (2012).
- 817 85. de Mendoza, A., Sebé-Pedrós, A. & Ruiz-Trillo, I. The Evolution of the GPCR Signaling  
818 System in Eukaryotes: Modularity, Conservation, and the Transition to Metazoan  
819 Multicellularity. *Genome Biol. Evol.* **6**, 606–619 (2014).
- 820 86. Krizsan, K. *et al.* Transcriptomic atlas of mushroom development highlights an  
821 independent origin of complex multicellularity. *bioRxiv* 349894 (2018).  
822 doi:10.1101/349894
- 823 87. Defosse, T. A. *et al.* Hybrid histidine kinases in pathogenic fungi. *Mol. Microbiol.* **95**, 914–  
824 924 (2015).
- 825 88. Hérivaux, A. *et al.* Major Sensing Proteins in Pathogenic Fungi: The Hybrid Histidine  
826 Kinase Family. *PLoS Pathog.* **12**, e1005683 (2016).
- 827 89. Kirk, D. L. A twelve-step program for evolving multicellularity and a division of labor.  
828 *BioEssays* **27**, 299–310 (2005).
- 829 90. Wang, L., Zhai, B. & Lin, X. The Link between Morphotype Transition and Virulence in  
830 *Cryptococcus neoformans*. *PLoS Pathog.* **8**, e1002765 (2012).
- 831 91. Kempf, M. *et al.* Disruption of the GPI Protein-Encoding Gene IFF4 of *Candida albicans*  
832 Results in Decreased Adherence and Virulence. *Mycopathologia* **168**, 73–77 (2009).
- 833 92. Moreno-Ruiz, E. *et al.* The GPI-modified proteins Pga59 and Pga62 of *Candida albicans*  
834 are required for cell wall integrity. *Microbiology* **155**, 2004–2020 (2009).
- 835 93. Nagy, L. G. Evolution: Complex Multicellular Life with 5,500 Genes. *Curr. Biol.* **27**, R609–  
836 R612
- 837 94. Nagy, L. G. *et al.* Latent homology and convergent regulatory evolution underlies the  
838 repeated emergence of yeasts. *Nat. Commun.* **5**, 4471 (2014).
- 839 95. Shen, X.-X. *et al.* Tempo and Mode of Genome Evolution in the Budding Yeast

- 840 Subphylum. *Cell* **175**, 1533–1545.e20 (2018).
- 841 96. Vierula, P. J. & Mais, J. M. A gene required for nuclear migration in *Neurospora crassa*  
842 codes for a protein with cysteine-rich, LIM/RING-like domains. *Mol. Microbiol.* **24**, 331–40  
843 (1997).
- 844 97. Fadri, M., Daquinag, A., Wang, S., Xue, T. & Kunz, J. The Pleckstrin Homology Domain  
845 Proteins Slm1 and Slm2 Are Required for Actin Cytoskeleton Organization in Yeast and  
846 Bind Phosphatidylinositol-4,5-Bisphosphate and TORC2. *Mol. Biol. Cell* **16**, 1883–1900  
847 (2005).
- 848 98. McGoldrick, C. A., Gruver, C. & May, G. S. myoA of *Aspergillus nidulans* encodes an  
849 essential myosin I required for secretion and polarized growth. *J. Cell Biol.* **128**, 577–87  
850 (1995).
- 851 99. Goodson, H. V., Anderson, B. L., Warrick, H. M., Pon, L. A. & Spudich, J. A. Synthetic  
852 lethality screen identifies a novel yeast myosin I gene (MYO5): myosin I proteins are  
853 required for polarization of the actin cytoskeleton. *J. Cell Biol.* **133**, 1277–91 (1996).
- 854 100. Prochnik, S. E. *et al.* Genomic analysis of organismal complexity in the multicellular green  
855 alga *volvox carteri*. *Science (80- )*. **329**, 223–226 (2010).
- 856 101. Richter, D. J., Fozouni, P., Eisen, M. B. & King, N. Gene family innovation, conservation  
857 and loss on the animal stem lineage. *Elife* **7**, (2018).
- 858 102. Grosberg, R. K. & Strathmann, R. R. The Evolution of Multicellularity: A Minor Major  
859 Transition? *Annu. Rev. Ecol. Evol. Syst.* **38**, 621–654 (2007).
- 860 103. Lozada-Chávez, I., Stadler, P. F. & Prohaska, S. J. Genome-wide features of introns are  
861 evolutionary decoupled among themselves and from genome size throughout Eukarya.  
862 *bioRxiv* 283549 (2018). doi:10.1101/283549
- 863 104. Lakämper, S., Kallipolitou, A., Woehlke, G., Schliwa, M. & Meyhöfer, E. Single fungal  
864 kinesin motor molecules move processively along microtubules. *Biophys. J.* **84**, 1833–43  
865 (2003).
- 866 105. Fujiwara, M., Horiuchi, H., Ohta, A. & Takagi, M. A Novel Fungal Gene Encoding Chitin  
867 Synthase with a Myosin Motor-like Domain. *Biochem. Biophys. Res. Commun.* **236**, 75–  
868 78 (1997).
- 869 106. Takeshita, N., Yamashita, S., Ohta, A. & Horiuchi, H. *Aspergillus nidulans* class V and VI  
870 chitin synthases CsmA and CsmB, each with a myosin motor-like domain, perform  
871 compensatory functions that are essential for hyphal tip growth. *Mol. Microbiol.* **59**, 1380–  
872 1394 (2006).
- 873 107. Sebé-Pedrós, A., Grau-Bové, X., Richards, T. A. & Ruiz-Trillo, I. Evolution and  
874 Classification of Myosins, a Paneukaryotic Whole-Genome Approach. *Genome Biol. Evol.*  
875 **6**, 290–305 (2014).
- 876 108. Abedin, M. & King, N. The premetazoan ancestry of cadherins. *Science (80- )*. **319**, 946–  
877 948 (2008).
- 878 109. Niklas, K. J. & Newman, S. A. The origins of multicellular organisms. *Evol Dev* **15**, 41–52  
879 (2013).
- 880 110. Grau-Bové, X. *et al.* Dynamics of genomic innovation in the unicellular ancestry of  
881 animals. *Elife* **6**, (2017).
- 882 111. Dettmann, A., Heilig, Y., Valerius, O., Ludwig, S. & Seiler, S. Fungal Communication  
883 Requires the MAK-2 Pathway Elements STE-20 and RAS-2, the NRC-1 Adapter STE-50  
884 and the MAP Kinase Scaffold HAM-5. *PLoS Genet.* **10**, e1004762 (2014).
- 885 112. Fischer, M. S., Wu, V. W., Lee, J. E., O'Malley, R. C. & Glass, N. L. Regulation of Cell-to-  
886 Cell Communication and Cell Wall Integrity by a Network of MAP Kinase Pathways and  
887 Transcription Factors in *Neurospora crassa*. *Genetics* **209**, 489–506 (2018).
- 888 113. Serrano, A. *et al.* Spatio-temporal MAPK dynamics mediate cell behavior coordination  
889 during fungal somatic cell fusion. *J. Cell Sci.* **131**, jcs.213462 (2018).
- 890 114. Albuquerque, P. & Casadevall, A. Quorum sensing in fungi—a review. *Med. Mycol.* **50**,



- 891 337–45 (2012).  
892 115. Cottier, F. & Mühlischlegel, F. A. Communication in Fungi. *Int. J. Microbiol.* **2012**, 9  
893 (2012).  
894 116. Darling, A. E., Carey, L. & Feng, W. The Design , Implementation , and Evaluation of  
895 mpiBLAST. *Proc. Clust.* **2003**, 13–15 (2003).  
896 117. van Dongen, S. Graph clustering by flow simulation. *Graph Stimul. by flow Clust.* **PhD**  
897 **thesis**, University of Utrecht (2000).  
898 118. Löytynoja, A. Phylogeny-aware alignment with PRANK. in 155–170 (Humana Press,  
899 Totowa, NJ, 2014). doi:10.1007/978-1-62703-646-7\_10  
900 119. Capella-Gutierrez, S., Silla-Martinez, J. M. & Gabaldon, T. trimAl: a tool for automated  
901 alignment trimming in large-scale phylogenetic analyses. *Bioinformatics* **25**, 1972–1973  
902 (2009).  
903 120. Price, M. N., Dehal, P. S. & Arkin, A. P. FastTree: Computing Large Minimum Evolution  
904 Trees with Profiles instead of a Distance Matrix. *Mol. Biol. Evol.* **26**, 1641–1650 (2009).  
905 121. Stamatakis, A. RAxML-VI-HPC: maximum likelihood-based phylogenetic analyses with  
906 thousands of taxa and mixed models. *Bioinformatics* **22**, 2688–2690 (2006).  
907 122. Felsenstein, J. A comparative method for both discrete and continuous characters using  
908 the threshold model. *Am. Nat.* **179**, 145–56 (2012).  
909 123. Revell, L. J. ANCESTRAL CHARACTER ESTIMATION UNDER THE THRESHOLD  
910 MODEL FROM QUANTITATIVE GENETICS. *Evolution (N. Y.)*. **68**, 743–759 (2014).  
911 124. Ihaka, R. & Gentleman, R. R: A Language for Data Analysis and Graphics. *J. Comput.*  
912 *Graph. Stat.* **5**, 299–314 (1996).  
913 125. Camacho, C. *et al.* BLAST+: Architecture and applications. *BMC Bioinformatics* **10**, 1–9  
914 (2009).  
915 126. Ohm, R. A. *et al.* Diverse Lifestyles and Strategies of Plant Pathogenesis Encoded in the  
916 Genomes of Eighteen Dothideomycetes Fungi. *PLoS Pathog.* **8**, e1003037 (2012).  
917 127. Katoh, K., Misawa, K., Kuma, K. & Miyata, T. MAFFT: a novel method for rapid multiple  
918 sequence alignment based on fast Fourier transform. *Nucleic Acids Res.* **30**, 3059–66  
919 (2002).  
920 128. Stamatakis, A. RAxML version 8: A tool for phylogenetic analysis and post-analysis of  
921 large phylogenies. *Bioinformatics* **30**, 1312–1313 (2014).  
922 129. Chen, K., Durand, D. & Farach-Colton, M. NOTUNG: A Program for Dating Gene  
923 Duplications and Optimizing Gene Family Trees. *J. Comput. Biol.* **7**, 429–447 (2000).  
924 130. Nagy, L. G. *et al.* Comparative genomics of early-diverging mushroom-forming fungi  
925 provides insights into the origins of lignocellulose decay capabilities. *Mol. Biol. Evol.* **33**,  
926 959–970 (2016).  
927 131. Park, G. *et al.* Global Analysis of Serine-Threonine Protein Kinase Genes in *Neurospora*  
928 *crassa*. *Eukaryot. Cell* **10**, 1553–1564 (2011).  
929 132. Nagy, L. G. *et al.* Genetic Bases of Fungal White Rot Wood Decay Predicted by  
930 Phylogenomic Analysis of Correlated Gene-Phenotype Evolution. *Mol. Biol. Evol.* **34**, 35–  
931 44 (2017).  
932  
933  
934  
935  
936  
937  
938  
939  
940  
941



942  
943  
944  
945  
946  
947  
948  
949  
950  
951  
952  
953  
954  
955  
956  
957  
958  
959  
960  
961  
962  
963  
964  
965  
966  
967  
968  
969  
970  
971  
972  
973  
974  
975  
976  
977  
978  
979  
980  
981  
982  
983  
984

## Supplementary Figures

For

### Comparative genomics reveals the origin of hyphae and multicellularity

Enikő Kiss, Botond Hegedüs, Torda Varga, Zsolt Merényi, Tamás Kószó, Balázs Bálint, Arun N. Prasanna, Meritxell Riquelme, Norio Takeshita, László G. Nagy

#### Contents:

- Supplementary Figure 1. Phylogenetic age distribution of hypha morphogenesis genes.*
- Supplementary Figure 2. Statistical comparisons of basic structural properties of genes related to hyphal MC.*
- Supplementary Figure 3. Reconstructions of ancestral gene copy numbers of histidine-kinase genes.*
- Supplementary Figure 4. Reconstructions of ancestral gene copy numbers of NADPH-oxidase genes.*

985

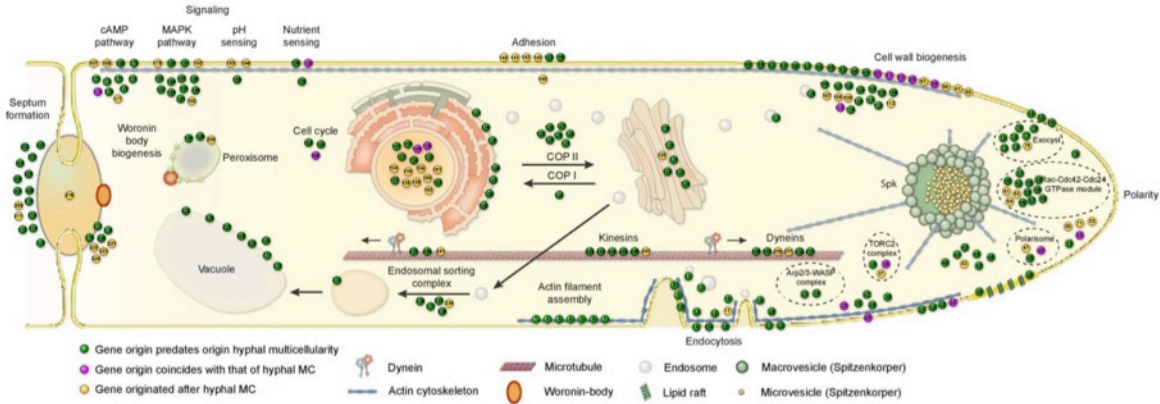

|                                     |                                             |                                          |                                     |                                      |
|-------------------------------------|---------------------------------------------|------------------------------------------|-------------------------------------|--------------------------------------|
| 1 pfv1_Afu4g03050                   | 51 Afu1g02920 (mesA in A.nidulans)          | 101 pld3_Afu3g05630                      | 151 setA_Afu4g09080                 | 201 Afu6g02840                       |
| 2 act1_Afu6g04740                   | 52 Afu4g04120                               | 102 Afu5g05550 (myov_myoE in A.nidulans) | 152 MAT1-2_Afu3g06170               | 202 aspc_Afu5g03080                  |
| 3 Afu1g10570 (coffin in A.nidulans) | 53 Afu1g06090 (tear in A.nidulans)          | 103 dda_Afu2g06050                       | 153 Afu3g06040                      | 203 Afu1g02940                       |
| 4 Afu1g03060                        | 54 scm8_Afu2g13430                          | 104 Afu2g01510                           | 154 Afu2g05020 (dopa in A.nidulans) | 204 aspB_Afu7g05370                  |
| 5 Afu3g09350                        | 55 chsE_Afu2g13440                          | 105 Afu6g02920 (synk in A.nidulans)      | 155 Afu4g04502                      | 205 Afu6g10330                       |
| 6 Afu1g10060                        | 56 hst1_Afu2g12400                          | 106 Afu5g10810                           | 156 Afu2g10770                      | 206 aspA_Afu5g08540                  |
| 7 Afu2g14270                        | 57 Afu6g02810 (elmo_1ike in A.nidulans)     | 107 Afu2g07590                           | 157 steA_Afu5g06190                 | 207 aspE_Afu3g07015                  |
| 8 Afu3g12080 (arfb in A.nidulans)   | 58 Afu2g05740 (modA in A.nidulans)          | 108 Afu5g05770                           | 158 Afu2g12910                      | 208 Afu5g02220                       |
| 9 Afu4g10020                        | 59 rca_Afu3g05300                           | 109 Afu3g05580                           | 159 Afu7g02260                      | 209 Afu1g13170                       |
| 10 Afu5g07930                       | 60 rho1_Afu6g06900                          | 110 Afu2g13760                           | 160 ace2_Afu3g11250                 | 210 Afu2g12390 (mobA in A.nidulans)  |
| 11 Afu4g08040 (ratB in A.nidulans)  | 61 Afu1g04340 (stock180_1ike in A.nidulans) | 111 Afu6g02510                           | 161 pacC_Afu3g11970                 | 211 Afu6g05680                       |
| 12 Afu2g02810                       | 62 Afu2g11860                               | 112 Afu1g12040                           | 162 weta_Afu4g13230                 | 212 Afu1g11010                       |
| 13 Afu2g01200                       | 63 Afu3g06280                               | 113 ags2_Afu2g11270                      | 163 Afu2g16840                      | 213 cdcA_Afu3g12250                  |
| 14 Afu6g02070 (infA in A.nidulans)  | 64 Afu5g07430                               | 114 Afu3g12800                           | 164 Afu4g12160                      | 214 Afu5g08700 (myoB in A.nidulans)  |
| 15 Afu7g03680                       | 65 rho4_Afu2g14060                          | 115 Afu6g02320                           | 165 Afu6g04810                      | 215 hysA_Afu3g14480                  |
| 16 sac6_Afu2g07420                  | 66 Afu2g15050                               | 116 gfa1_Afu6g06340                      | 166 Afu4g06130                      | 216 Afu6g06520                       |
| 17 Afu2g10220                       | 67 Afu4g14450 (cdc24 in A.nidulans)         | 117 Afu5g06670                           | 167 gpcC_Afu2g12640                 | 217 Afu7g05950                       |
| 18 Afu2g08850 (dnfB in A.nidulans)  | 68 Afu5g11380                               | 118 Afu1g10970                           | 168 gpcC_Afu7g04800                 | 218 Afu5g03940                       |
| 19 Afu6g02850                       | 69 rsm2_Afu080550                           | 119 Afu6g04840 (hysA in A.nidulans)      | 169 gprI_Afu3g00780                 | 219 casI_Afu5g09360                  |
| 20 Afu6g02540                       | 70 rca_Afu1g11230                           | 120 Afu5g03580 (gppB in A.nidulans)      | 170 gprI_Afu3g01150                 | 220 cnbB_Afu4g04540                  |
| 21 Afu5g05950                       | 71 Afu2g02520 (teak in A.nidulans)          | 121 Afu4g10040                           | 171 sfaD_Afu5g12210                 | 221 Afu5g03400                       |
| 22 Afu3g14230                       | 72 Afu6g11370 (exoB4 in A.nidulans)         | 122 kevB_Afu4g12970                      | 172 gpaA_Afu1g13140                 | 222 ENO1_Afu1g04260                  |
| 23 Afu1g13330 (arp2)                | 73 Afu1g13790 (cecC in A.nidulans)          | 123 Afu1g1900                            | 173 gpaB_Afu1g12930                 | 223 bud4_Afu2g06470                  |
| 24 Afu6g05660 (myoA in A.nidulans)  | 74 Afu6g02790                               | 124 Afu4g08850                           | 174 Afu1g13250                      | 224 Afu5g11890 (bud3 in A.nidulans)  |
| 25 Afu7g03870                       | 75 Afu2g11960 (exo70 in A.nidulans)         | 125 Afu6g03840                           | 175 rca_Afu4g08820                  | 225 Afu1g04080 (vps52 in A.nidulans) |
| 26 Afu1g05930                       | 76 Afu6g05290 (cec15 in A.nidulans)         | 126 Afu6g07290                           | 176 rcaA_Afu6g08320                 | 226 Afu4g07110                       |
| 27 pti1_Afu6g07520                  | 77 Afu4g10490 (cec6 in A.nidulans)          | 127 Afu1g11470                           | 177 pdeB_Afu1g05230                 | 227 Afu5g13540                       |
| 28 Afu3g06140 (slbB in A.nidulans)  | 78 Afu1g04350 (cecC in A.nidulans)          | 128 Afu3g08840 (copA in A.nidulans)      | 178 pkaR_Afu3g10000                 | 228 Afu1g05280 (vpsB in A.nidulans)  |
| 29 Afu6g04520                       | 79 Afu5g08040 (cecC in A.nidulans)          | 129 Afu4g07390                           | 179 pkaA_Afu5g07980                 | 229 Afu6g04870 (vps45 in A.nidulans) |
| 30 Afu1g13020                       | 80 ger1_Afu6g12410                          | 130 Afu3g09700                           | 180 sho1_Afu5g08420                 | 230 Afu5g02360 (vpsA in A.nidulans)  |
| 31 Afu4g03160                       | 81 crk3_Afu3g09250                          | 131 Afu4g13150                           | 181 Afu3g09740                      | 231 Afu1g10810                       |
| 32 Afu5g05710 (swcC in A.nidulans)  | 82 ccm3_Afu4g06820                          | 132 hysB_Afu7g05700                      | 182 preB_Afu3g13330                 | 232 Afu2g13750 (hbrA in A.nidulans)  |
| 33 Afu1g02900                       | 83 kve6_Afu2g11870                          | 133 pm2_Afu1g07690                       | 183 sak1_Afu5g08390                 | 233 Afu2g04740 (vps27 in A.nidulans) |
| 34 rgsB_Afu4g12640                  | 84 chsA_Afu3g03760                          | 134 pm4_Afu6g04500                       | 184 sakB_Afu1g10940                 | 234 Afu1g02220 (vps20 in A.nidulans) |
| 35 Afu2g10460                       | 85 Afu4g06620                               | 135 Afu2g12580                           | 185 ptcG_Afu5g13340                 | 235 Afu3g13890 (vps24 in A.nidulans) |
| 36 Afu6g07910                       | 86 chsA_Afu2g01870                          | 136 Afu2g02340                           | 186 Afu5g06420                      | 236 Afu3g14380 (vps23 in A.nidulans) |
| 37 sm1_Afu2g12210                   | 87 chsB_Afu4g01880                          | 137 Afu1g13210                           | 187 sakA_Afu1g12340                 | 237 Afu1g04200 (vps33 in A.nidulans) |
| 38 Afu3g13440 (staA in A.nidulans)  | 88 chC_Afu5g00760                           | 138 chw11_Afu6g04210                     | 188 mpkB_Afu6g12820                 | 238 Afu4g04100                       |
| 39 Afu4g06290 (bnaA in A.nidulans)  | 89 chg_Afu3g14420                           | 139 Afu1g05470                           | 189 artA_Afu2g03290                 | 239 Afu1g13390 (mpkA in A.nidulans)  |
| 40 steA_Afu1g03760                  | 90 scw4_Afu6g12380                          | 140 roa_Afu5g09580                       | 190 sak_Afu6g11470                  | 240 epi_Afu3g11860                   |
| 41 Afu3g06080                       | 91 crmA_Afu6g14090                          | 141 rodB_Afu1g17250                      | 191 vpd1_Afu4g10280                 | 241 Afu2g08190 (coa in A.nidulans)   |
| 42 Afu2g02530                       | 92 ags1_Afu3g00910                          | 142 rodE_Afu6g05090                      | 192 Afu4g04070                      | 242 Afu2g03150                       |
| 43 Afu2g08180 (fbaA in A.nidulans)  | 93 exo1_Afu1g03600                          | 143 gtrB_Afu3g12700                      | 193 Afu3g14900                      | 243 Afu7g01400                       |
| 44 erg9_Afu7g01220                  | 94 chs3_Afu8g05620                          | 144 Afu2g12180                           | 194 path_Afu5g13270                 | 244 Afu6g04660 (clpA in A.nidulans)  |
| 45 Afu4g08070 (swfF in A.nidulans)  | 95 lgl1_Afu1g11460                          | 145 Afu1g01540                           | 195 Afu6g04600                      | 245 Afu1g14220                       |
| 46 Afu6g12920                       | 96 neq1_Afu6g07120                          | 146 gpaA_Afu3g02970                      | 196 meaa_Afu2g05880                 | 246 Afu3g14730                       |
| 47 Afu1g09940                       | 97 swm1_Afu7g05450                          | 147 Afu8g05570                           | 197 Afu2g08800                      | 247 Afu7g03710 (ktpA in A.nidulans)  |
| 48 Afu2g03710 (sepA in A.nidulans)  | 98 chn2_Afu1g12600                          | 148 hst1_Afu5g01300                      | 198 pen11_Afu6g07740                | 248 Afu3g10720                       |
| 49 Afu6g04940 (sepA in A.nidulans)  | 99 chsF_Afu8g05630                          | 149 stua_Afu2g07900                      | 199 Afu2g17000 (wscA in A.nidulans) | 249 Afu2g13450 (nudM in A.nidulans)  |
| 50 Afu1g11920 (teac in A.nidulans)  | 100 otrA_Afu3g05650                         | 150 medA_Afu2g13260                      | 200 hexA_Afu5g08830                 | 250 Afu5g08430                       |
|                                     |                                             |                                          |                                     | 251 Afu5g08510                       |
|                                     |                                             |                                          |                                     | 252 Afu6g12970                       |
|                                     |                                             |                                          |                                     | 253 Afu5g11810 (nudA in A.nidulans)  |
|                                     |                                             |                                          |                                     | 254 Afu1g12570                       |
|                                     |                                             |                                          |                                     | 255 Afu3g10530                       |

986

987

988

Supplementary Figure 1. Phylogenetic age distribution of hypha morphogenesis genes. Figure mirrors main text Figure 2 with gene names provided for each dot.

989

990

991

992

993

994

995

996

997

998

999

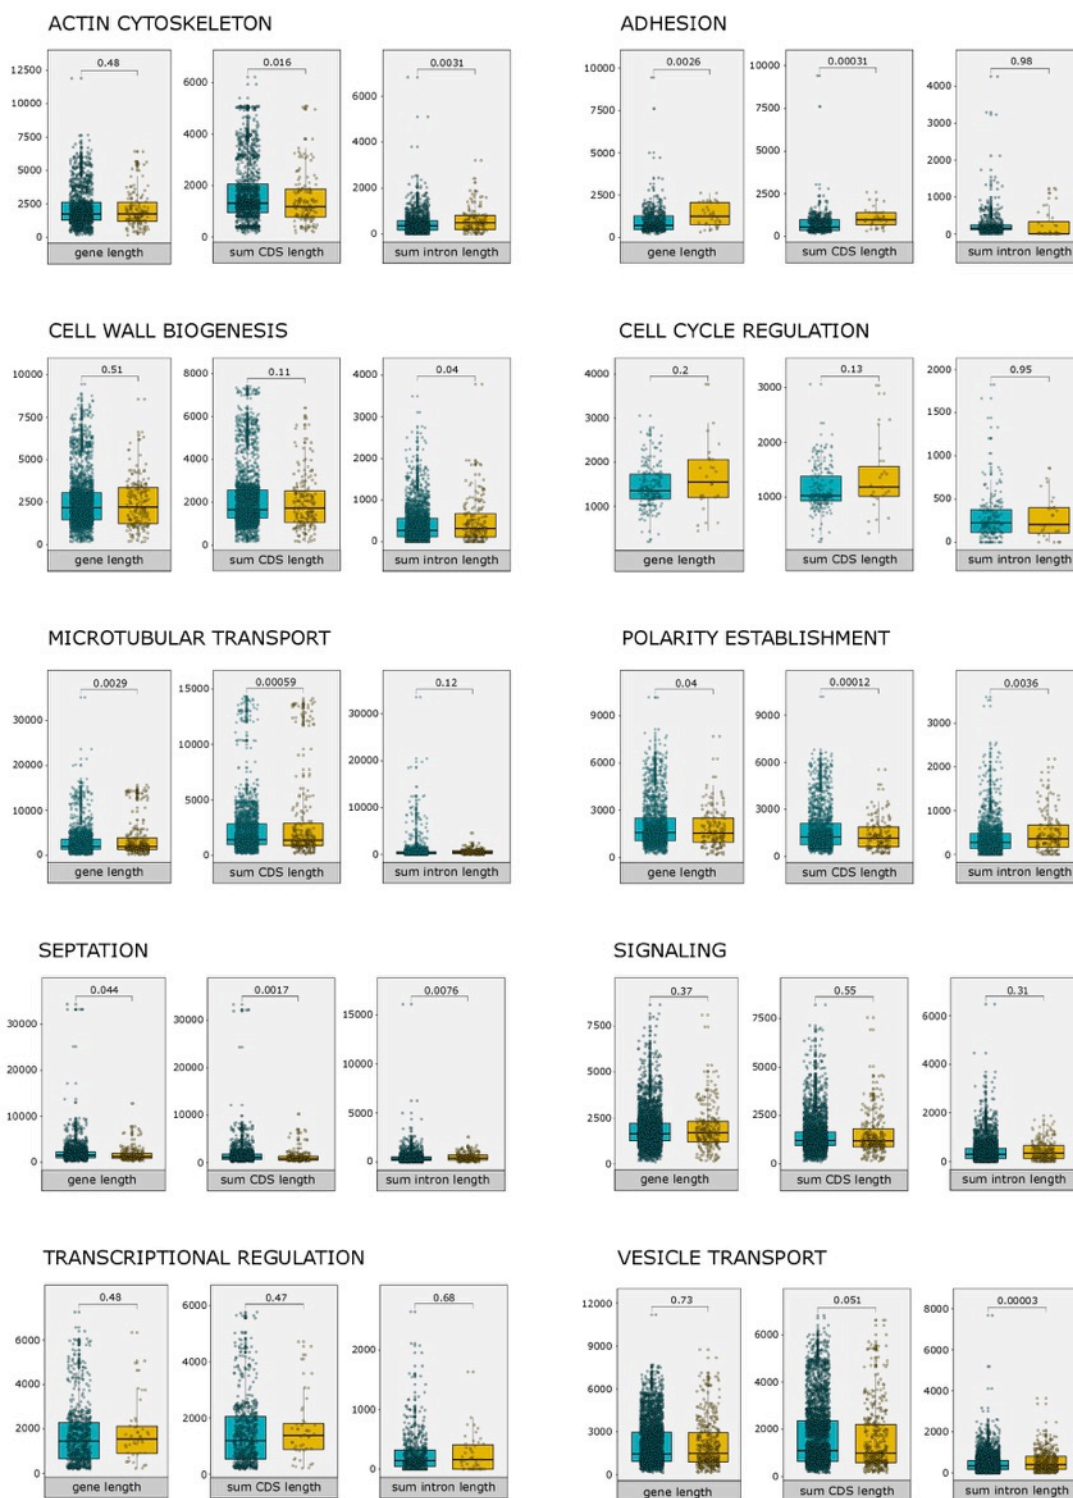

1000

 multicellular fungi

 unicellular fungi



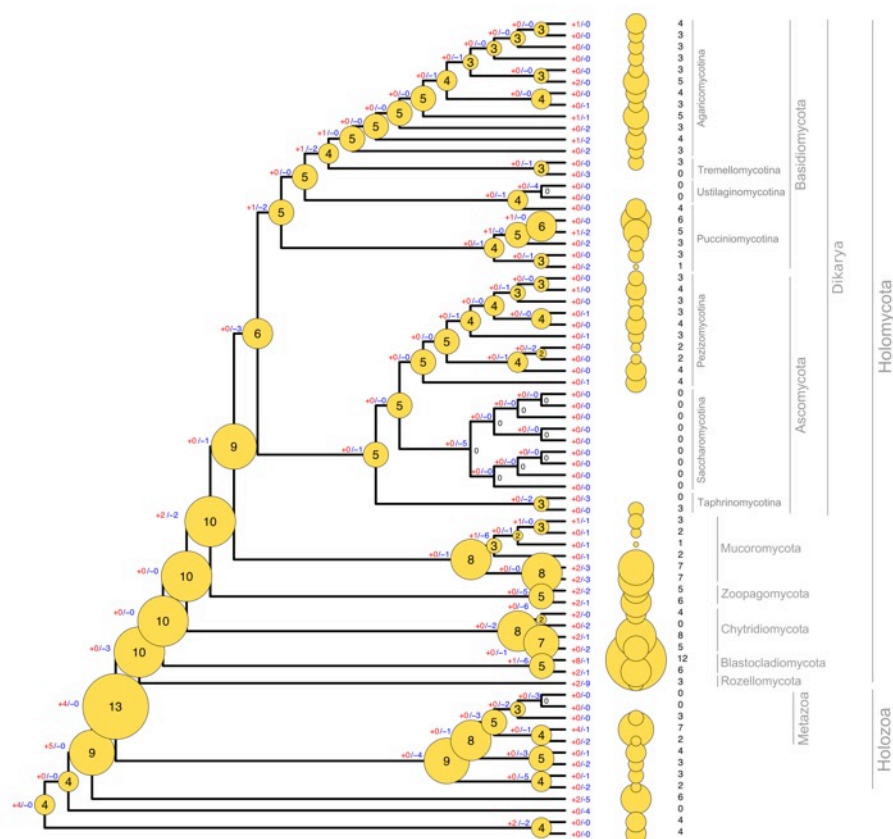

1023  
 1024 Supplementary Fig. 4. Reconstructions of ancestral gene copy numbers of NADPH-oxidase  
 1025 genes. Numbers at the branches represent gene duplications (+) and losses (-) inferred by  
 1026 COMPARE. Bubble size is proportional to reconstructed ancestral gene copy number. Copy  
 1027 number distribution for each species is shown right to the tree.  
 1028  
 1029
